# Supplementary material
Source: PubMed Central journal article supplement (PMC5518681)
Supplement: NIHMS877283-supplement-1.pdf [file NIHMS877283-supplement-1.pdf]

# Supporting Information

## Structurally Diverse Alkaloids from the Seeds of *Peganum harmala*

Kai-Bo Wang,<sup>†,‡,Δ</sup> Da-Hong Li,<sup>†,Δ</sup> Yu Bao,<sup>§</sup> Fei Cao,<sup>†</sup> Wen-Jing Wang,<sup>†</sup> Clement Lin,<sup>‡</sup> Wen Bin,<sup>§</sup> Jiao Bai,<sup>†</sup> Yue-Hu Pei,<sup>†</sup> Yong-Kui Jing,<sup>§</sup> Danzhou Yang,<sup>\*,‡</sup> Zhan-Lin Li,<sup>\*,†</sup> and Hui-Ming Hua<sup>\*,†</sup>

<sup>†</sup>Key Laboratory of Structure-Based Drug Design & Discovery, Ministry of Education and <sup>§</sup>School of Life Science and Biopharmaceutics, Shenyang Pharmaceutical University, Shenyang 110016, Liaoning, People's Republic of China

<sup>‡</sup>Department of Medicinal Chemistry and Molecular Pharmacology, College of Pharmacy, Purdue University, West Lafayette, Indiana 47907, United States

<sup>Δ</sup>Key Laboratory of Pharmaceutical Quality Control of Hebei Province, College of Pharmaceutical Sciences, Hebei University, Baoding 071002, People's Republic of China

### Corresponding Author

\*E-mail: huimhua@163.com

\*E-mail: lz11030@hotmail.com

\*E-mail: yangdz@purdue.edu

# Content

|                                                                                                                                            |    |
|--------------------------------------------------------------------------------------------------------------------------------------------|----|
| <b>Figure S1</b> The main conformers for (2 <i>S</i> ,6 <i>S</i> )- <b>1</b> obtained by conformational searching in CONFLEX software..... | 4  |
| <b>Figure S2.</b> Lowest energy 3D conformers of <b>3a</b> . .....                                                                         | 5  |
| <b>Figure S3.</b> Lowest energy 3D conformers of <b>3b</b> . .....                                                                         | 6  |
| <b>Figure S4</b> The chiral HPLC separation chromatogram of peganine A ( <b>1</b> ).....                                                   | 7  |
| <b>Figure S5</b> The chiral HPLC separation chromatogram of peganine B ( <b>2</b> ).....                                                   | 7  |
| <b>Figure S6</b> The <sup>1</sup> H NMR spectrum of peganine A ( <b>1</b> ) in DMSO- <i>d</i> <sub>6</sub> (400 MHz).....                  | 8  |
| <b>Figure S7</b> The <sup>13</sup> C NMR spectrum of peganine A ( <b>1</b> ) in DMSO- <i>d</i> <sub>6</sub> (100 MHz) .....                | 9  |
| <b>Figure S8</b> The HSQC spectrum of peganine A ( <b>1</b> ) in DMSO- <i>d</i> <sub>6</sub> (600 MHz).....                                | 10 |
| <b>Figure S9</b> The HMBC spectrum of peganine A ( <b>1</b> ) in DMSO- <i>d</i> <sub>6</sub> (600 MHz) .....                               | 11 |
| <b>Figure S10</b> The NOESY spectrum of peganine A ( <b>1</b> ) in DMSO- <i>d</i> <sub>6</sub> (600 MHz).....                              | 12 |
| <b>Figure S11</b> The HRESIMS spectrum of peganine A ( <b>1</b> ) in MeOH .....                                                            | 13 |
| <b>Figure S12</b> The ECD spectrum of (+)-peganine A ( <b>1a</b> ) and (–)-peganine A ( <b>1b</b> ).....                                   | 14 |
| <b>Figure S13</b> The <sup>1</sup> H NMR spectrum of peganine B ( <b>2</b> ) in DMSO- <i>d</i> <sub>6</sub> (400 MHz) .....                | 15 |
| <b>Figure S14</b> The <sup>13</sup> C NMR spectrum of peganine B ( <b>2</b> ) in DMSO- <i>d</i> <sub>6</sub> (100 MHz) .....               | 16 |
| <b>Figure S15</b> The HSQC spectrum of peganine B ( <b>2</b> ) in DMSO- <i>d</i> <sub>6</sub> (600 MHz).....                               | 17 |
| <b>Figure S16</b> The HMBC spectrum of peganine B ( <b>2</b> ) in DMSO- <i>d</i> <sub>6</sub> (600 MHz).....                               | 18 |
| <b>Figure S17</b> The NOESY spectrum of peganine B ( <b>2</b> ) in DMSO- <i>d</i> <sub>6</sub> (600 MHz) .....                             | 19 |
| <b>Figure S18</b> The HRESIMS spectrum of peganine B ( <b>2</b> ) in MeOH.....                                                             | 20 |
| <b>Figure S19</b> The ECD spectrum of (+)-peganine B ( <b>2a</b> ) and (–)-peganine B ( <b>2b</b> ).....                                   | 21 |
| <b>Figure S20</b> The <sup>1</sup> H NMR spectrum of peganumal A ( <b>3</b> ) in DMSO- <i>d</i> <sub>6</sub> (600 MHz) .....               | 22 |
| <b>Figure S21</b> The <sup>13</sup> C NMR spectrum of peganumal A ( <b>3</b> ) in DMSO- <i>d</i> <sub>6</sub> (150 MHz) .....              | 23 |
| <b>Figure S22</b> The HSQC spectrum of peganumal A ( <b>3</b> ) in DMSO- <i>d</i> <sub>6</sub> (600 MHz).....                              | 24 |
| <b>Figure S23</b> The HMBC spectrum of peganumal A ( <b>3</b> ) in DMSO- <i>d</i> <sub>6</sub> (600 MHz).....                              | 25 |
| <b>Figure S24</b> The HRESIMS spectrum of peganumal A ( <b>3</b> ) in MeOH.....                                                            | 26 |
| <b>Figure S25</b> The <sup>1</sup> H NMR spectrum of peganumal B ( <b>4</b> ) in DMSO- <i>d</i> <sub>6</sub> (400 MHz) .....               | 27 |
| <b>Figure S26</b> The <sup>13</sup> C NMR spectrum of peganumal B ( <b>4</b> ) in DMSO- <i>d</i> <sub>6</sub> (100 MHz) .....              | 28 |
| <b>Figure S27</b> The HSQC spectrum of peganumal B ( <b>4</b> ) in DMSO- <i>d</i> <sub>6</sub> (600 MHz).....                              | 29 |
| <b>Figure S28</b> The HMBC spectrum of peganumal B ( <b>4</b> ) in DMSO- <i>d</i> <sub>6</sub> (600 MHz).....                              | 30 |

|                   |                                                                                                                               |    |
|-------------------|-------------------------------------------------------------------------------------------------------------------------------|----|
| <b>Figure S29</b> | The HRESIMS spectrum of peganumal B ( <b>4</b> ) in MeOH.....                                                                 | 31 |
| <b>Figure S30</b> | The <sup>1</sup> H NMR spectrum of pegaharmine F ( <b>5</b> ) in DMSO- <i>d</i> <sub>6</sub> (600 MHz).....                   | 32 |
| <b>Figure S31</b> | The <sup>13</sup> C NMR spectrum of pegaharmine F ( <b>5</b> ) in DMSO- <i>d</i> <sub>6</sub> (100 MHz).....                  | 33 |
| <b>Figure S32</b> | The HSQC spectrum of pegaharmine F ( <b>5</b> ) in DMSO- <i>d</i> <sub>6</sub> (600 MHz).....                                 | 34 |
| <b>Figure S33</b> | The HMBC spectrum of pegaharmine F ( <b>5</b> ) in DMSO- <i>d</i> <sub>6</sub> (600 MHz).....                                 | 35 |
| <b>Figure S34</b> | The HRESIMS spectrum of pegaharmine F ( <b>5</b> ) in MeOH.....                                                               | 36 |
| <b>Figure S35</b> | The <sup>1</sup> H NMR spectrum of pegaharmine G ( <b>6</b> ) in DMSO- <i>d</i> <sub>6</sub> (600 MHz).....                   | 37 |
| <b>Figure S36</b> | The <sup>13</sup> C NMR spectrum of pegaharmine G ( <b>6</b> ) in DMSO- <i>d</i> <sub>6</sub> (150 MHz).....                  | 38 |
| <b>Figure S37</b> | The HSQC spectrum of pegaharmine G ( <b>6</b> ) in DMSO- <i>d</i> <sub>6</sub> (600 MHz).....                                 | 39 |
| <b>Figure S38</b> | The HMBC spectrum of pegaharmine G ( <b>6</b> ) in DMSO- <i>d</i> <sub>6</sub> (600 MHz).....                                 | 40 |
| <b>Figure S39</b> | The HRESIMS spectrum of pegaharmine G ( <b>6</b> ) in MeOH.....                                                               | 41 |
| <b>Figure S40</b> | The <sup>1</sup> H NMR spectrum of pegaharmine H ( <b>7</b> ) in DMSO- <i>d</i> <sub>6</sub> (600 MHz).....                   | 42 |
| <b>Figure S41</b> | The <sup>13</sup> C NMR spectrum of pegaharmine H ( <b>7</b> ) in DMSO- <i>d</i> <sub>6</sub> (150 MHz).....                  | 43 |
| <b>Figure S42</b> | The HSQC spectrum of pegaharmine H ( <b>7</b> ) in DMSO- <i>d</i> <sub>6</sub> (600 MHz).....                                 | 44 |
| <b>Figure S43</b> | The HMBC spectrum of pegaharmine H ( <b>7</b> ) in DMSO- <i>d</i> <sub>6</sub> (600 MHz).....                                 | 45 |
| <b>Figure S44</b> | The HRESIMS spectrum of pegaharmine H ( <b>7</b> ) in MeOH.....                                                               | 46 |
| <b>Figure S45</b> | The <sup>1</sup> H NMR spectrum of pegaharmine I ( <b>8</b> ) in DMSO- <i>d</i> <sub>6</sub> (400 MHz).....                   | 47 |
| <b>Figure S46</b> | The <sup>13</sup> C NMR spectrum of pegaharmine I ( <b>8</b> ) in DMSO- <i>d</i> <sub>6</sub> (100 MHz).....                  | 48 |
| <b>Figure S47</b> | The HSQC spectrum of pegaharmine I ( <b>8</b> ) in DMSO- <i>d</i> <sub>6</sub> (600 MHz).....                                 | 49 |
| <b>Figure S48</b> | The HMBC spectrum of pegaharmine I ( <b>8</b> ) in DMSO- <i>d</i> <sub>6</sub> (600 MHz).....                                 | 50 |
| <b>Figure S49</b> | The HRESIMS spectrum of pegaharmine I ( <b>8</b> ) in MeOH.....                                                               | 51 |
| <b>Figure S50</b> | The <sup>1</sup> H NMR spectrum of pegaharmine J ( <b>9</b> ) in DMSO- <i>d</i> <sub>6</sub> (400 MHz).....                   | 52 |
| <b>Figure S51</b> | The <sup>13</sup> C NMR spectrum of pegaharmine J ( <b>9</b> ) in DMSO- <i>d</i> <sub>6</sub> (100 MHz).....                  | 53 |
| <b>Figure S52</b> | The HSQC spectrum of pegaharmine J ( <b>9</b> ) in DMSO- <i>d</i> <sub>6</sub> (600 MHz).....                                 | 54 |
| <b>Figure S53</b> | The HMBC spectrum of pegaharmine J ( <b>9</b> ) in DMSO- <i>d</i> <sub>6</sub> (600 MHz).....                                 | 55 |
| <b>Figure S54</b> | The HRESIMS spectrum of pegaharmine J ( <b>9</b> ) in MeOH.....                                                               | 56 |
| <b>Figure S55</b> | The <sup>1</sup> H NMR spectrum of pegaharmine K ( <b>10</b> ) in DMSO- <i>d</i> <sub>6</sub> (600 MHz).....                  | 57 |
| <b>Figure S56</b> | The <sup>13</sup> C NMR spectrum of pegaharmine K ( <b>10</b> ) in DMSO- <i>d</i> <sub>6</sub> (150 MHz).....                 | 58 |
| <b>Figure S57</b> | The <sup>1</sup> H- <sup>1</sup> H COSY spectrum of pegaharmine K ( <b>10</b> ) in DMSO- <i>d</i> <sub>6</sub> (600 MHz)..... | 59 |
| <b>Figure S58</b> | The HMBC spectrum of pegaharmine K ( <b>10</b> ) in DMSO- <i>d</i> <sub>6</sub> (600 MHz).....                                | 60 |
| <b>Figure S59</b> | The NOESY spectrum of pegaharmine K ( <b>10</b> ) in DMSO- <i>d</i> <sub>6</sub> (600 MHz).....                               | 61 |
| <b>Figure S60</b> | The HRESIMS spectrum of pegaharmine K ( <b>10</b> ) in MeOH.....                                                              | 62 |

**Figure S1** The main conformers for (2*S*,6*S*)-**1** obtained by conformational searching in CONFLEX software.

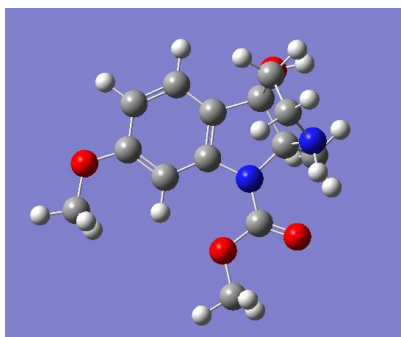

Con 1, 46.6 %

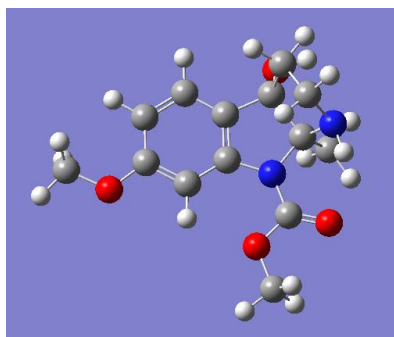

Con 2, 39.6 %

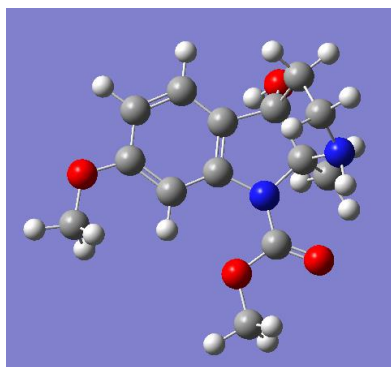

Con 3, 7.6 %

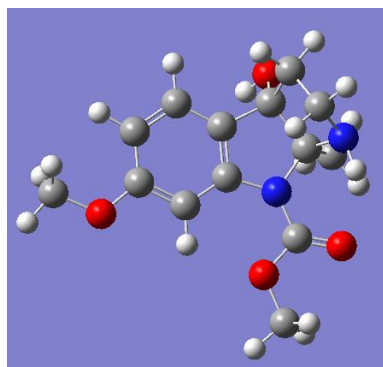

Con 4, 5.0

Figure S2. Lowest energy 3D conformers of 3a.

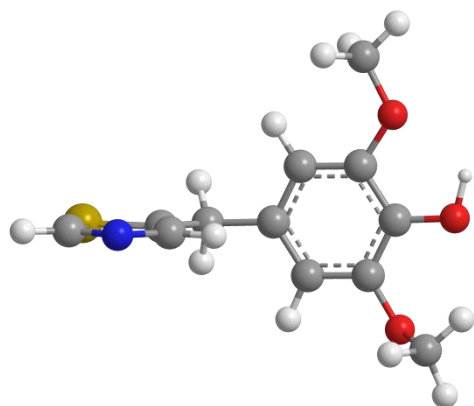

Con 1

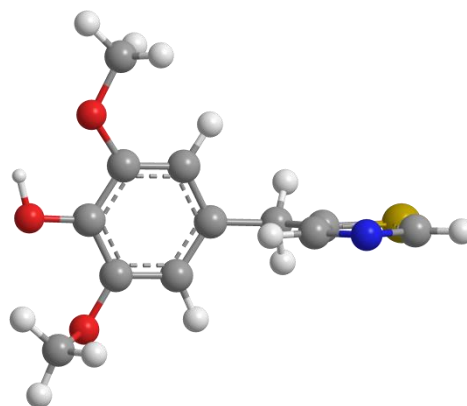

Con 2

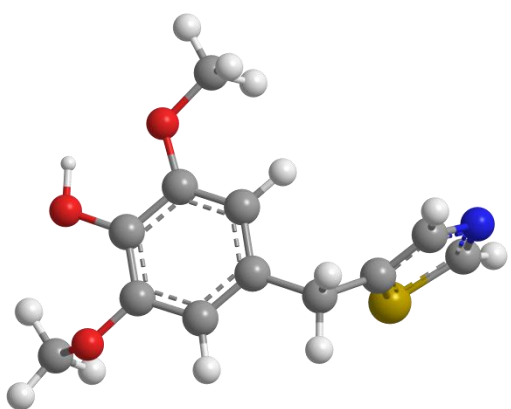

Con 3

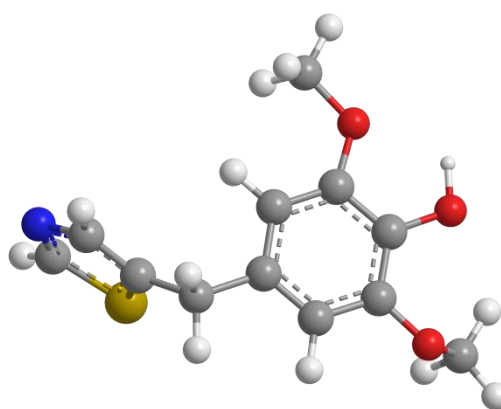

Con 4

Figure S3. Lowest energy 3D conformers of **3b**.

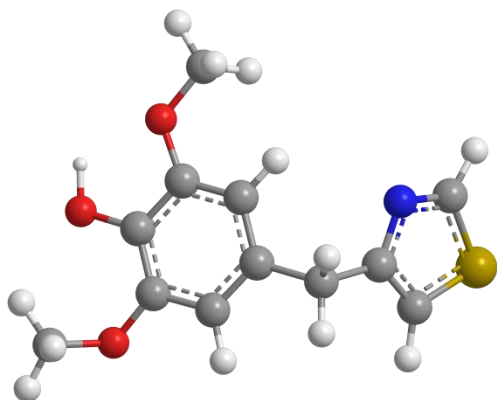

Con 1

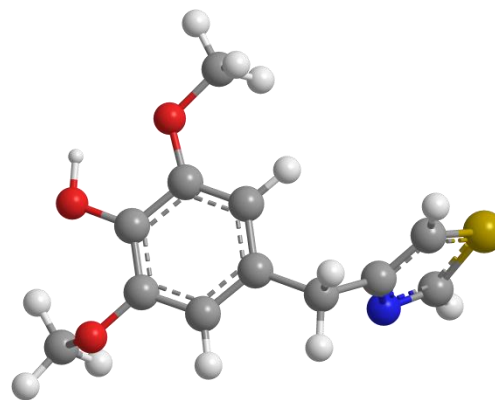

Con 2

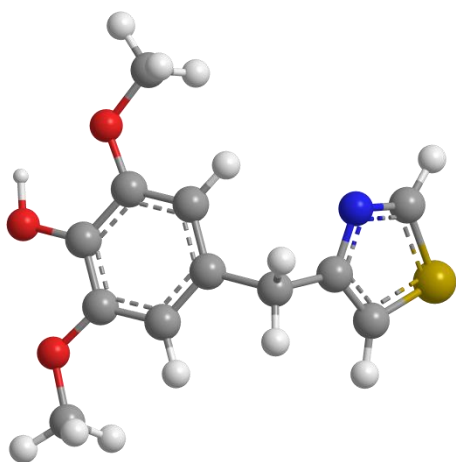

Con 3

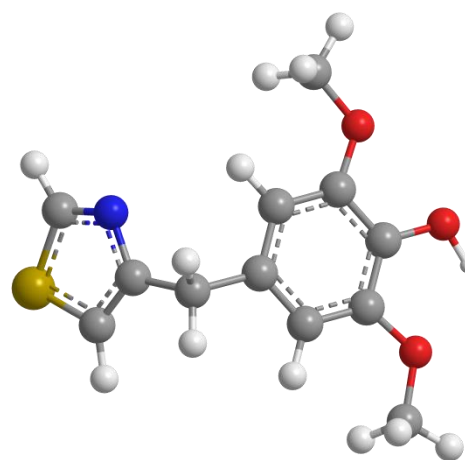

Con 4

**Figure S4** The chiral HPLC separation chromatogram of peganine A (1)

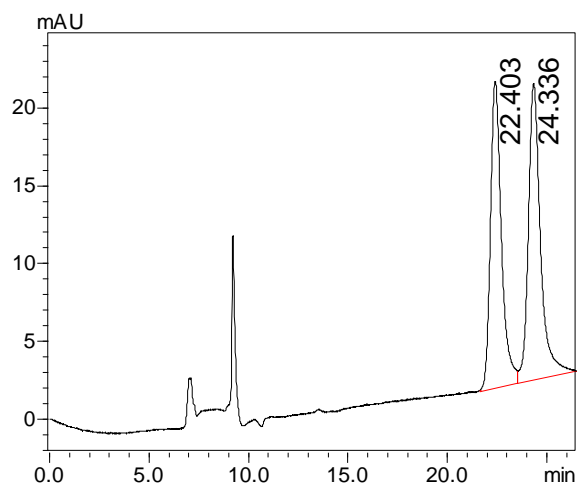

| Peak No. | Time   | Area   | Area %  | Plate number | Tailing | Resolution |
|----------|--------|--------|---------|--------------|---------|------------|
| 1        | 22.403 | 753257 | 48.2142 | 8852.740     | 1.480   | --         |
| 2        | 24.336 | 809056 | 51.7858 | 9204.738     | 1.370   | 1.965      |

**Figure S5** The chiral HPLC separation chromatogram of peganine B (2)

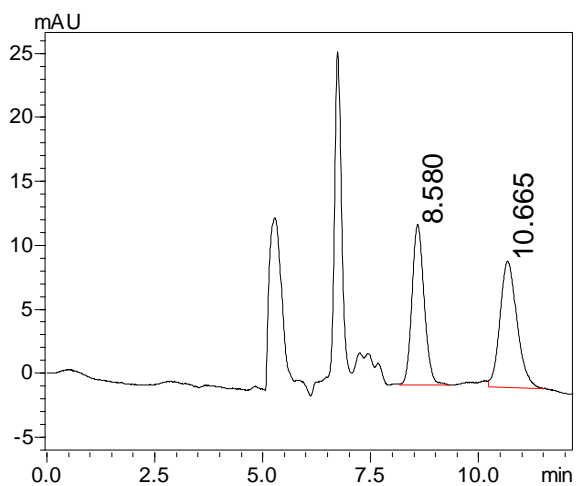

| Peak No. | Time   | Area   | Area %  | Plate number | Tailing | Resolution |
|----------|--------|--------|---------|--------------|---------|------------|
| 1        | 8.580  | 247883 | 48.1066 | 4287.745     | 1.143   | --         |
| 2        | 10.665 | 267396 | 51.8934 | 3628.523     | 1.169   | 3.383      |

Figure S6 The  $^1\text{H}$  NMR spectrum of peganine A (1) in  $\text{DMSO-}d_6$  (400 MHz)

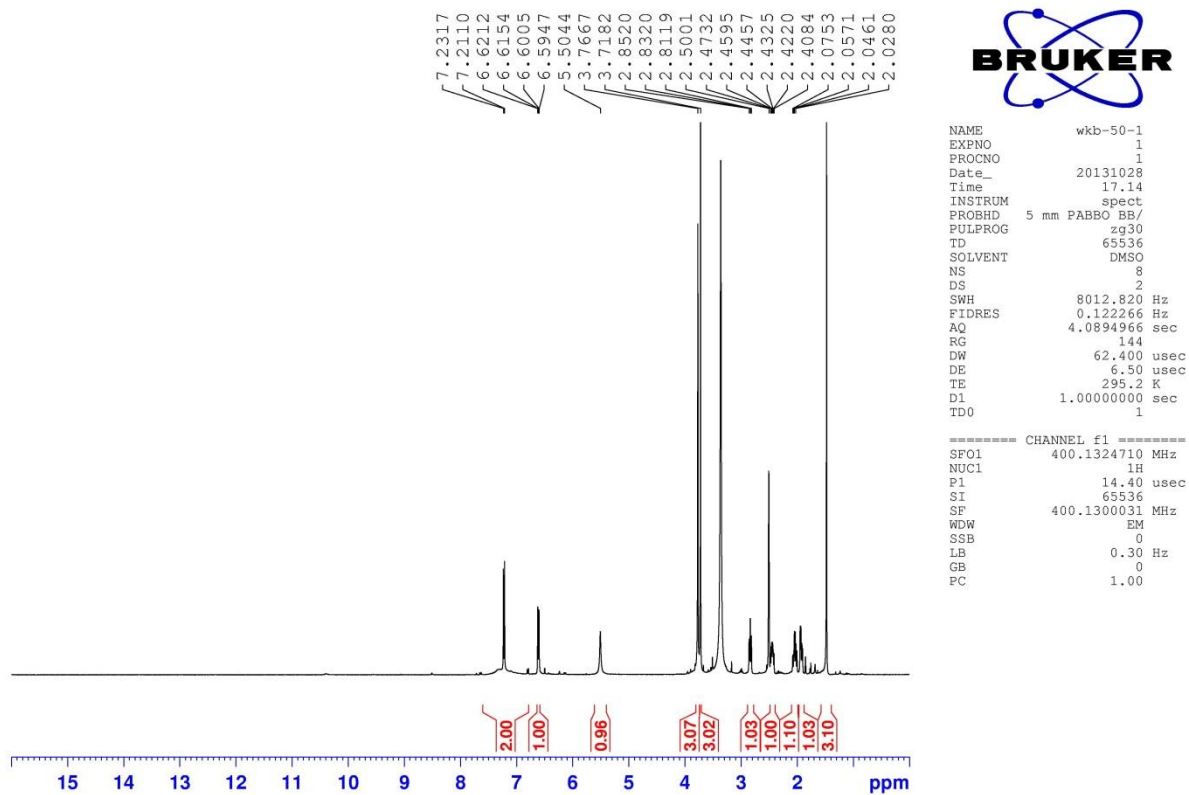



**Figure S7** The  $^{13}\text{C}$  NMR spectrum of peganine A (**1**) in  $\text{DMSO-}d_6$  (100 MHz)

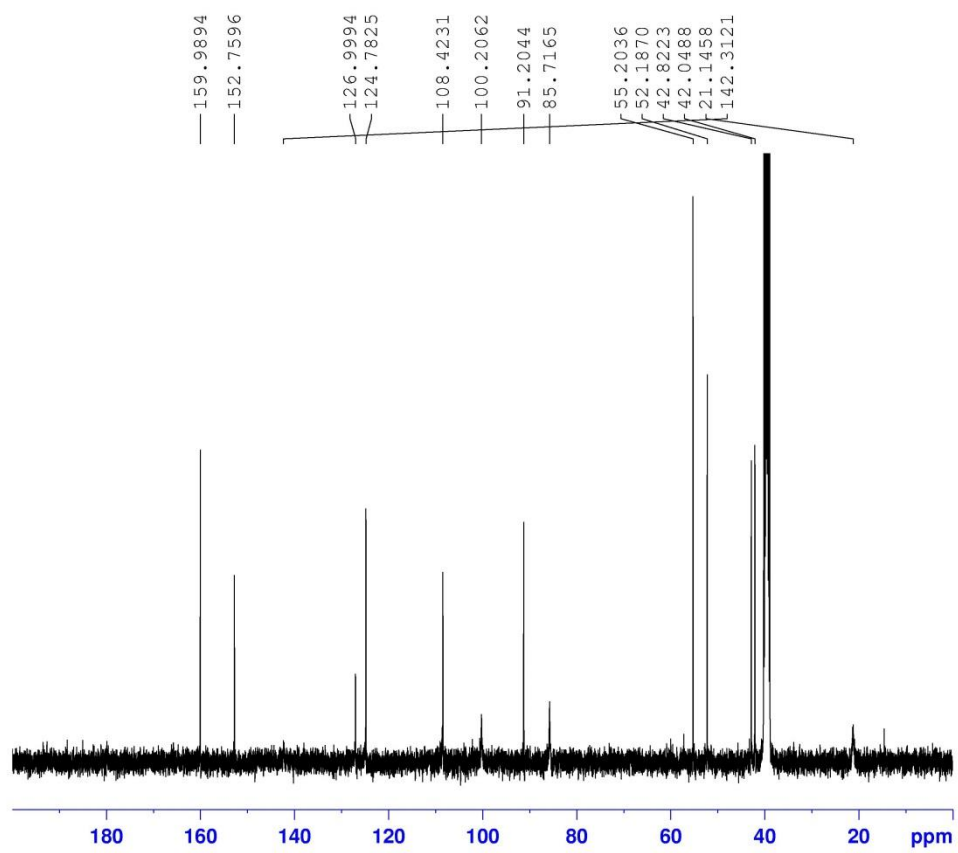

**Figure S8** The HSQC spectrum of peganine A (**1**) in DMSO-*d*<sub>6</sub> (600 MHz)

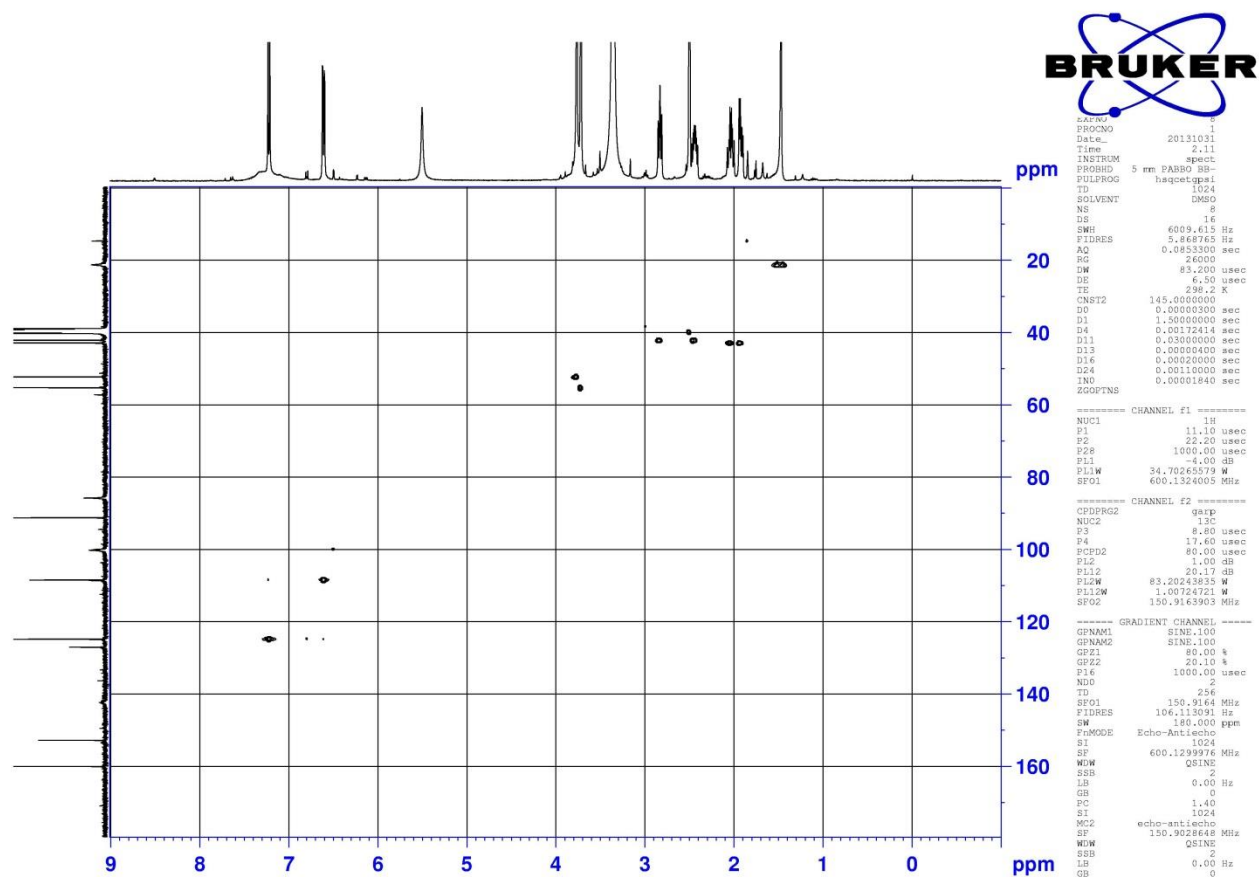

Figure S9 The HMBC spectrum of peganine A (1) in DMSO-*d*<sub>6</sub> (600 MHz)

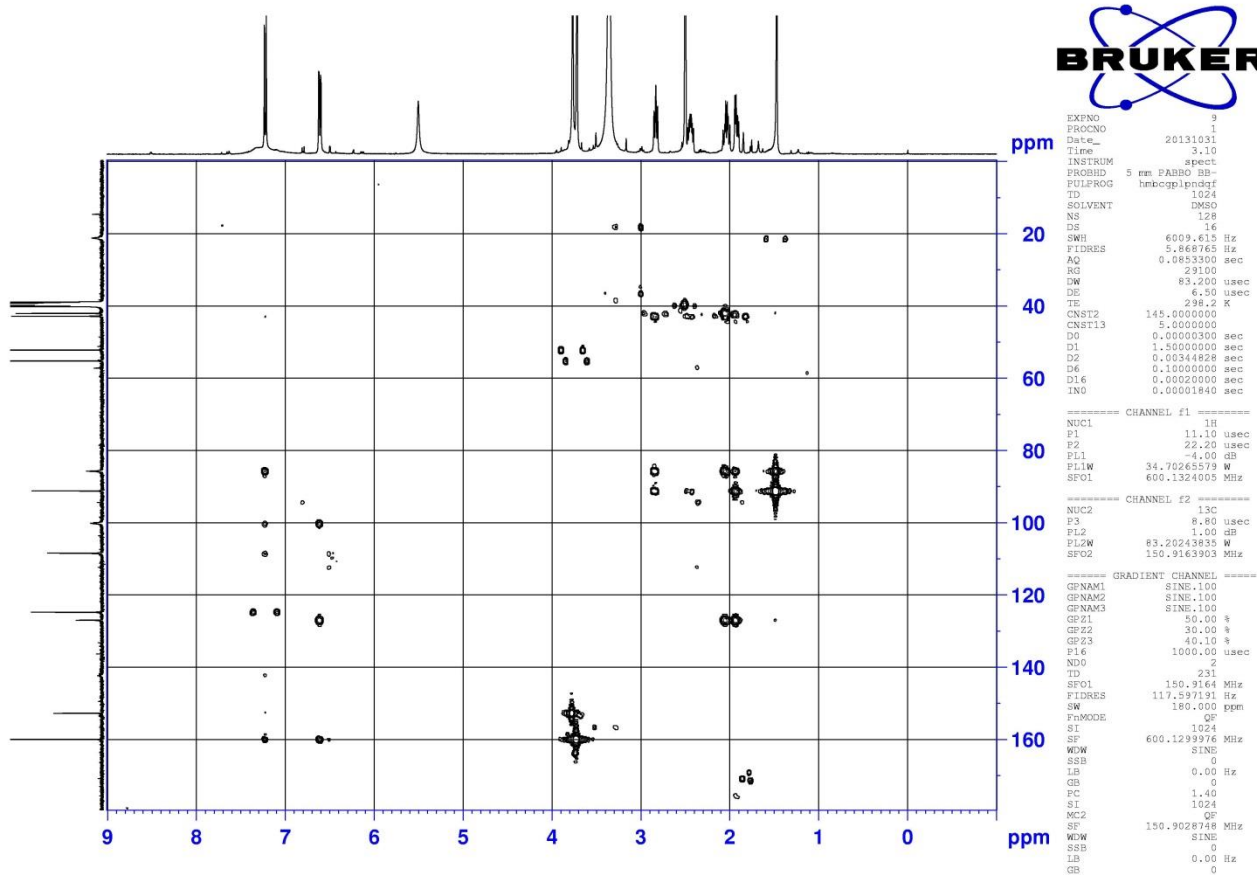

**Figure S10** The NOESY spectrum of peganine A (**1**) in DMSO-*d*<sub>6</sub> (600 MHz)

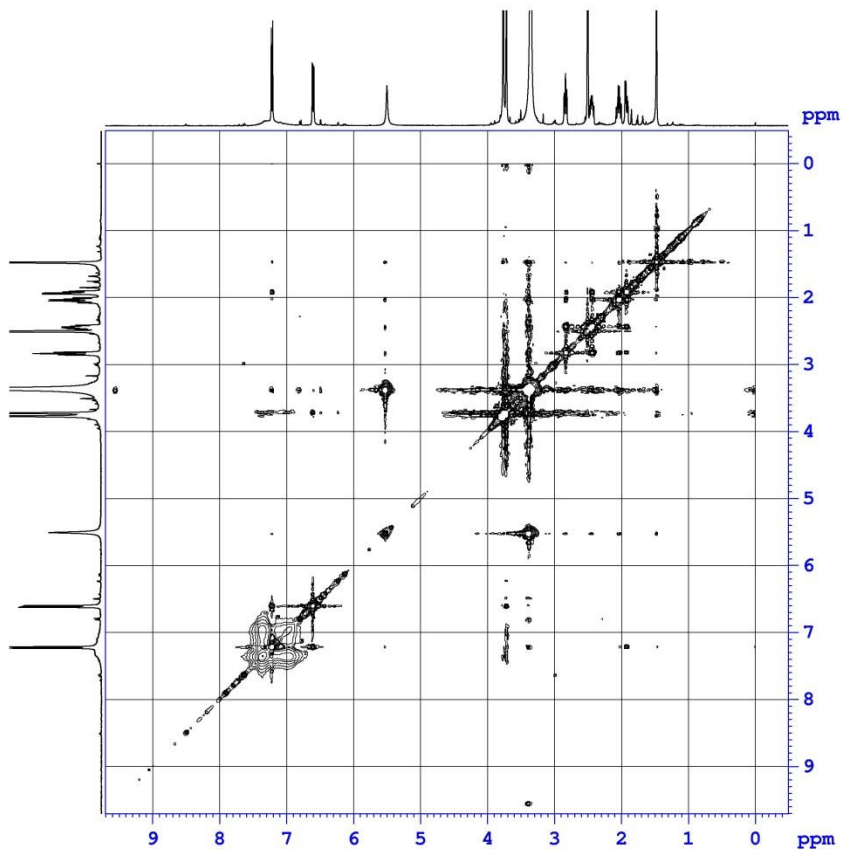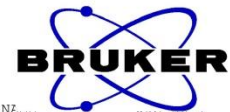

```

NZ_... .. 6
EXPNO 1
PROCNO 1
Date_ 20131206
Time 0.05
INSTRUM spect
PROBHD 5 mm PABBO BB-
PULPROG noesyph
TD 1024
SOLVENT DMSO
NS 4
DS 4
SWH 6009.615 Hz
FIDRES 5.868765 Hz
AQ 0.0853300 sec
RG 114
DW 83.200 usec
DE 6.50 usec
TE 289.8 K
D0 0.00006907 sec
D1 2.00000000 sec
D8 0.60000002 sec
IN0 0.00016640 sec
  
```

```

===== CHANNEL f1 =====
NUC1 1H
P1 11.10 usec
PL1 -4.00 dB
PL1W 34.70265579 W
SF01 600.1330006 MHz
ND0 1
TD 256
SF01 600.133 MHz
FIDRES 23.475046 Hz
SW 10.014 ppm
FnMODE States-TPPI
SI 1024
SF 600.1300000 MHz
WDW QSINE
SSB 2
LB 0.00 Hz
GB 0
PC 1.00
SI 1024
MC2 States-TPPI
SF 600.1300000 MHz
WDW QSINE
SSB 2
LB 0.00 Hz
GB 0
  
```

**Figure S11** The HRESIMS spectrum of peganine A (1) in MeOH

### Mass Spectrum Molecular Formula Report

**Analysis Info**

Analysis Name D:\Data\20131121\WKB-50\_1-b,6\_01\_2222.d  
 Method 20131026\_ceyang.m  
 Sample Name WKB-50  
 Comment

Acquisition Date 11/21/2013 10:18:30 AM

Operator Bruker Customer  
 Instrument / Ser# micrOTOF-Q 125

**Acquisition Parameter**

|             |          |                       |           |                  |           |
|-------------|----------|-----------------------|-----------|------------------|-----------|
| Source Type | ESI      | Ion Polarity          | Positive  | Set Nebulizer    | 1.2 Bar   |
| Focus       | Active   | Set Capillary         | 4500 V    | Set Dry Heater   | 180 °C    |
| Scan Begin  | 50 m/z   | Set End Plate Offset  | -500 V    | Set Dry Gas      | 8.0 l/min |
| Scan End    | 1000 m/z | Set Collision Cell RF | 300.0 Vpp | Set Divert Valve | Source    |

**Generate Molecular Formula Parameter**

|                  |            |                             |        |
|------------------|------------|-----------------------------|--------|
| Formula, min.    | C14H19N2O4 |                             |        |
| Formula, max.    |            |                             |        |
| Measured m/z     | 279.132    | Tolerance                   | 10 ppm |
| Check Valence    | no         | Minimum                     | 1      |
| Nitrogen Rule    | yes        | Electron Configuration both |        |
| Filter H/C Ratio | yes        | Minimum                     | 0      |
| Estimate Carbon  | yes        | Charge                      | 1      |
|                  |            | Maximum                     | 10     |
|                  |            | Maximum                     | 3      |

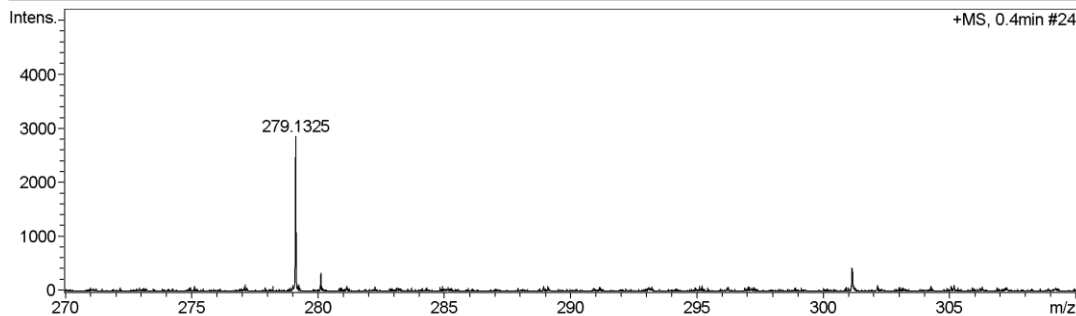

| Sum Formula       | Sigma | m/z      | Err [ppm] | Mean Err [ppm] | Err [mDa] | rdb  | N Rule | e <sup>-</sup> |
|-------------------|-------|----------|-----------|----------------|-----------|------|--------|----------------|
| C 14 H 19 N 2 O 4 | 0.095 | 279.1339 | 5.10      | 5.09           | 1.42      | 6.50 | ok     | even           |

**Figure S12** The ECD spectrum of (+)-peganine A (**1a**) and (-)-peganine A (**1b**)

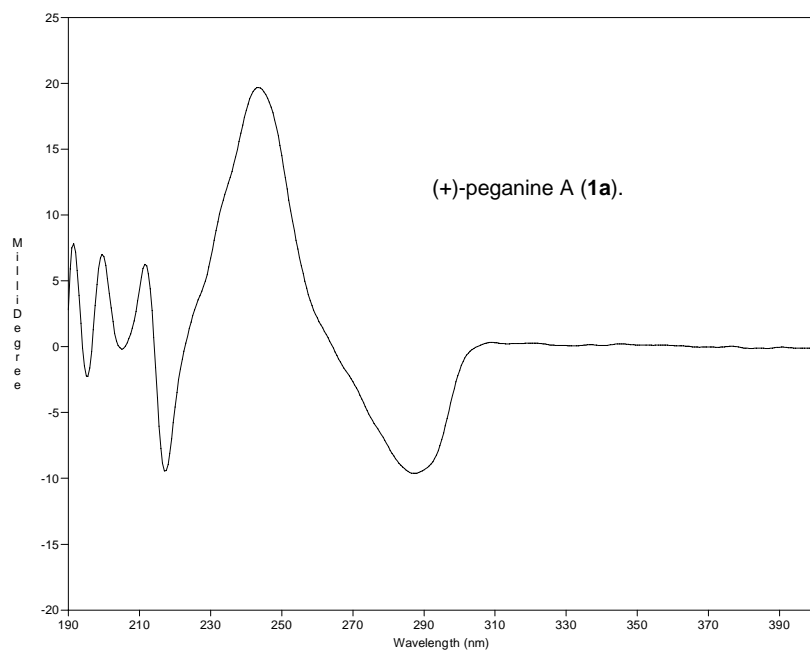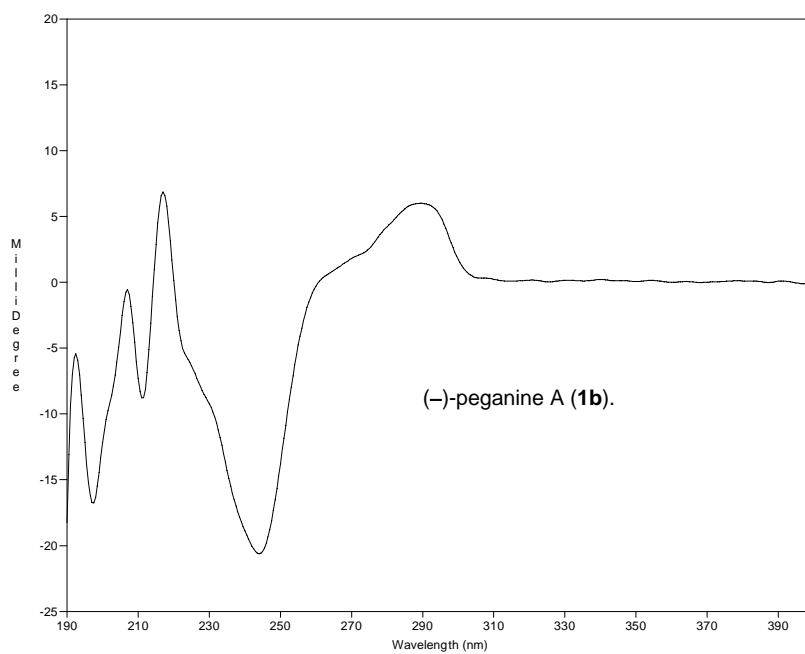

Figure S13 The  $^1\text{H}$  NMR spectrum of peganine B (**2**) in  $\text{DMSO-}d_6$  (400 MHz)

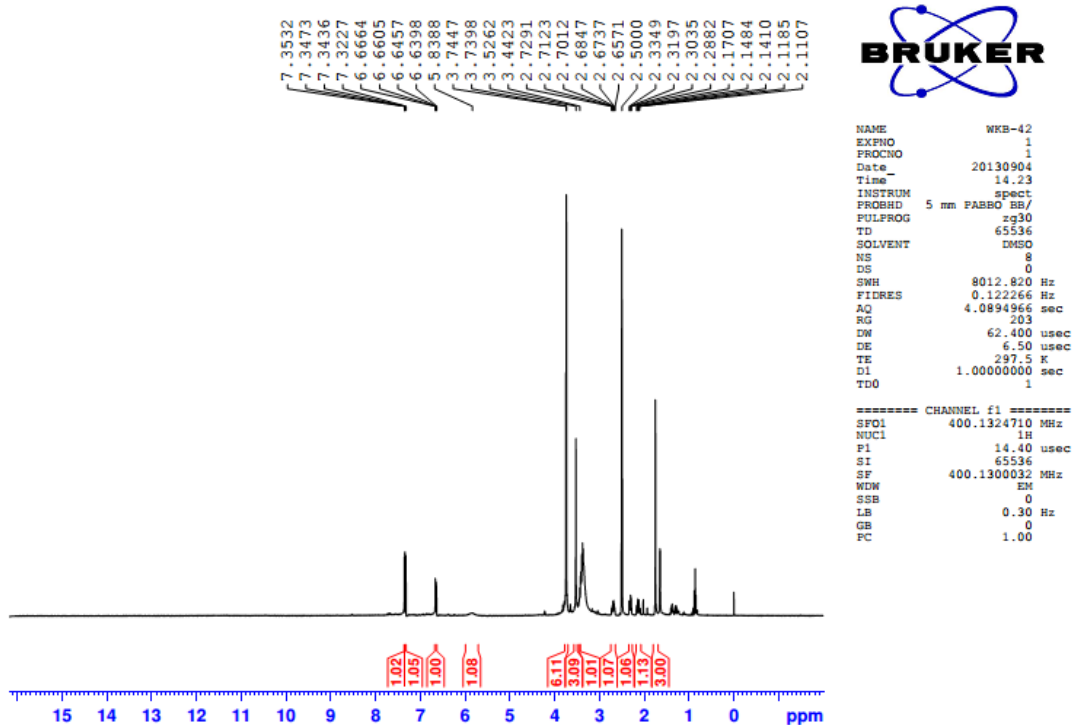

Figure S14 The  $^{13}\text{C}$  NMR spectrum of peganine B (2) in  $\text{DMSO-}d_6$  (100 MHz)

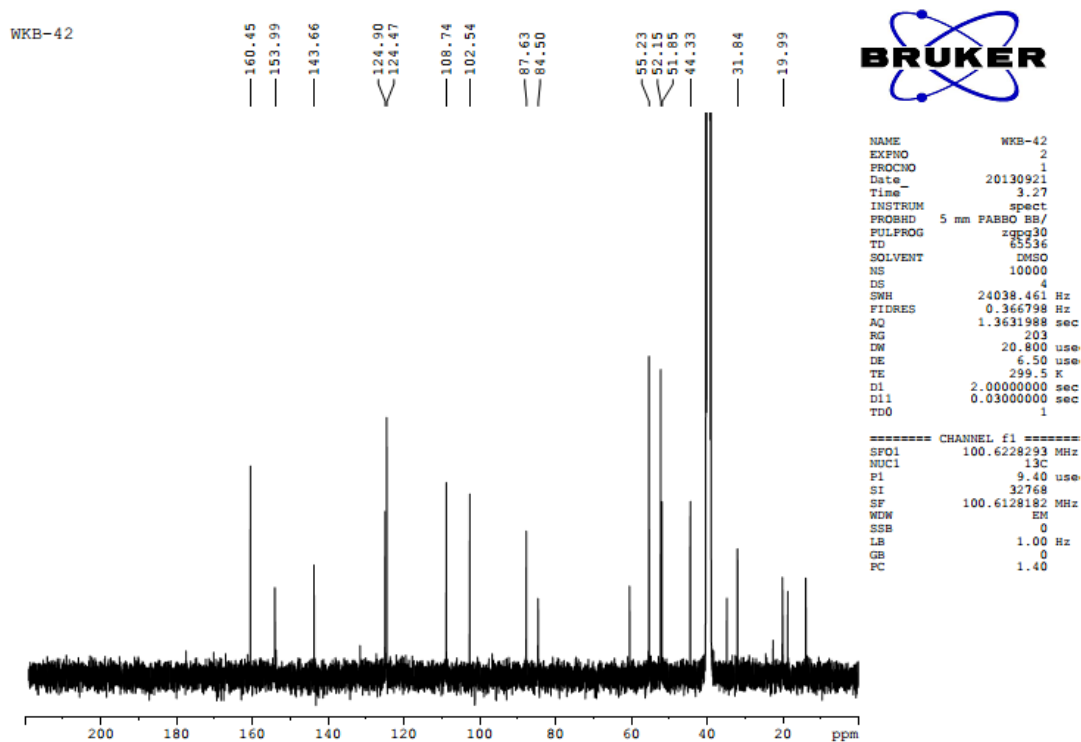



Figure S15 The HSQC spectrum of peganine B (2) in DMSO-*d*<sub>6</sub> (600 MHz)

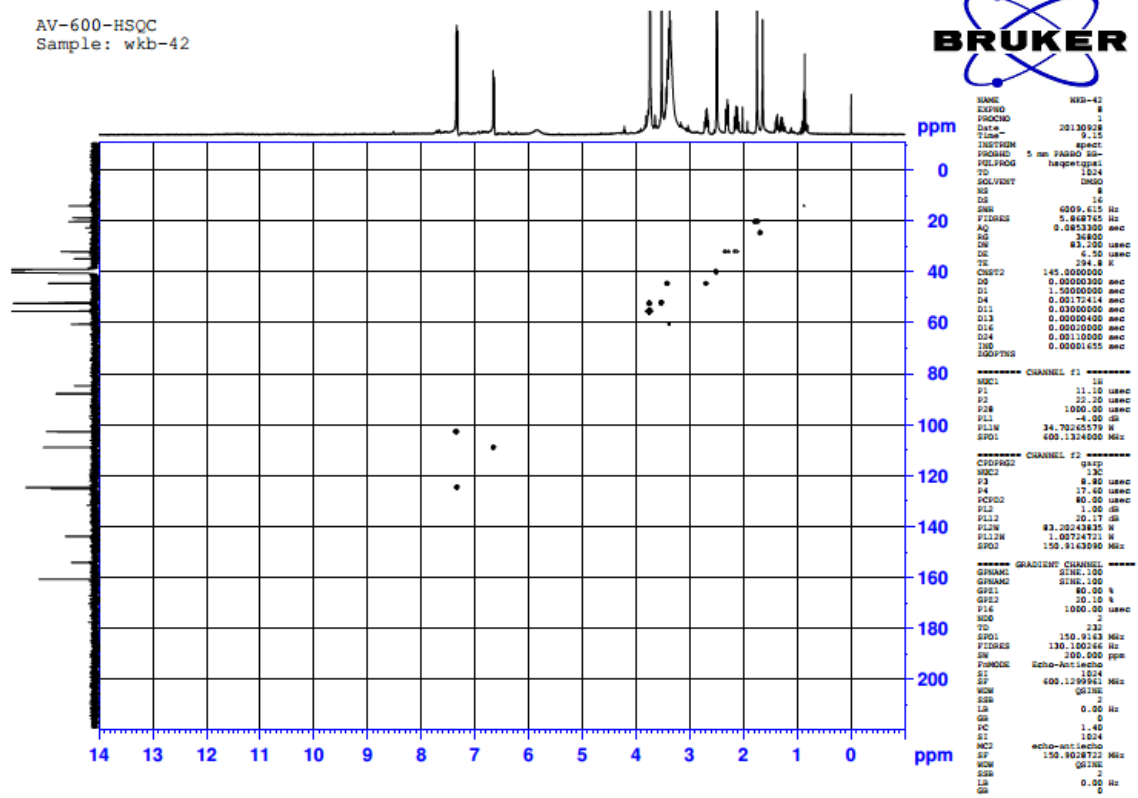

Figure S16 The HMBC spectrum of peganine B (2) in DMSO-*d*<sub>6</sub> (600 MHz)

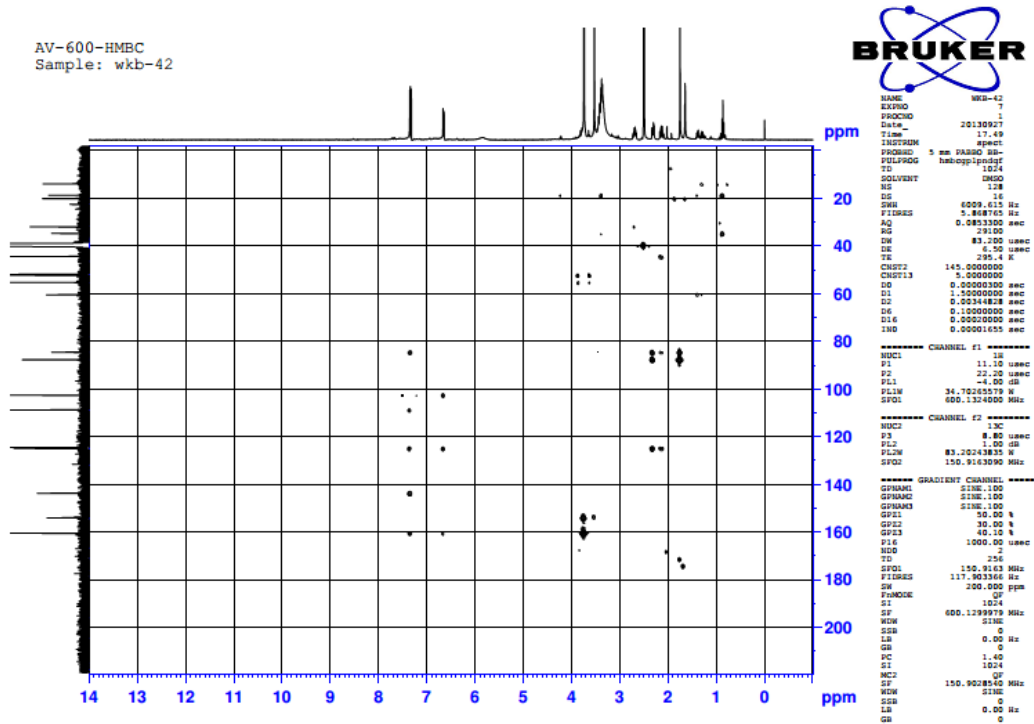

Figure S17 The NOESY spectrum of peganine B (2) in DMSO-*d*<sub>6</sub> (600 MHz)

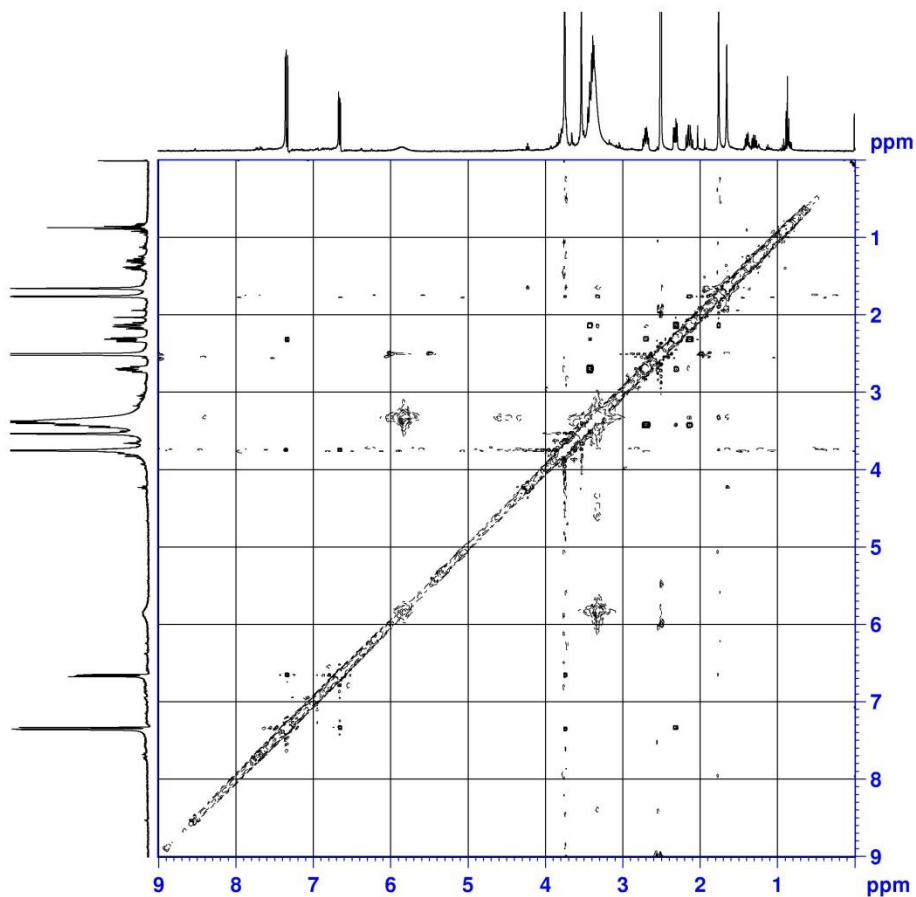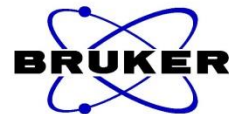

```

NAME          WKB-42
EXPNO         6
PROCNO        1
Date_         20131117
Time          20.31
INSTRUM       spect
PROBHD        5 mm PABBO BB-
PULPROG       noesyph
TD            1024
SOLVENT       DMSO
NS            4
DS            4
SWH           6009.615 Hz
FIDRES        5.868765 Hz
AQ            0.0853300 sec
RG            256
DW            83.200 usec
DE            6.50 usec
TE            298.2 K
D0            0.00006907 sec
D1            2.00000000 sec
D8            0.60000002 sec
IN0           0.00016640 sec

===== CHANNEL f1 =====
NUC1           1H
P1             11.10 usec
PL1            -4.00 dB
PL1W          34.70265579 W
SFO1          600.1324005 MHz
ND0            1
TD            256
SFO1          600.1324 MHz
FIDRES        23.475023 Hz
SW            10.014 ppm
FnMODE        States-TPPI
SI            1024
SF            600.1299980 MHz
WDW           QSINE
SSB           2
LB            0.00 Hz
GB            0
PC            1.00
SI            1024
MC2           States-TPPI
SF            600.1299958 MHz
WDW           QSINE
SSB           2
LB            0.00 Hz
GB            0
    
```

**Figure S18** The HRESIMS spectrum of peganine B (2) in MeOH

## Mass Spectrum Molecular Formula Report

**Analysis Info**

Analysis Name D:\Data\20131031-CEYANG\WKB-42\_1-a,3\_01\_1961.d  
 Method ldj\_bga\_jh.m  
 Sample Name WKB-42  
 Comment

Acquisition Date 10/31/2013 2:01:11 PM

Operator Bruker Customer  
 Instrument / Ser# micrOTOF-Q 125

**Acquisition Parameter**

|             |          |                       |           |                  |           |
|-------------|----------|-----------------------|-----------|------------------|-----------|
| Source Type | ESI      | Ion Polarity          | Positive  | Set Nebulizer    | 0.3 Bar   |
| Focus       | Active   | Set Capillary         | 4500 V    | Set Dry Heater   | 180 °C    |
| Scan Begin  | 50 m/z   | Set End Plate Offset  | -500 V    | Set Dry Gas      | 4.0 l/min |
| Scan End    | 1000 m/z | Set Collision Cell RF | 250.0 Vpp | Set Divert Valve | Source    |

**Generate Molecular Formula Parameter**

|                  |              |                             |        |         |   |
|------------------|--------------|-----------------------------|--------|---------|---|
| Formula, min.    | C16H20N2O6Na |                             |        |         |   |
| Formula, max.    |              |                             |        |         |   |
| Measured m/z     | 359.122      | Tolerance                   | 10 mDa | Charge  | 1 |
| Check Valence    | no           | Minimum                     | 0      | Maximum | 0 |
| Nitrogen Rule    | no           | Electron Configuration both |        |         |   |
| Filter H/C Ratio | no           | Minimum                     | 0      | Maximum | 3 |
| Estimate Carbon  | yes          |                             |        |         |   |

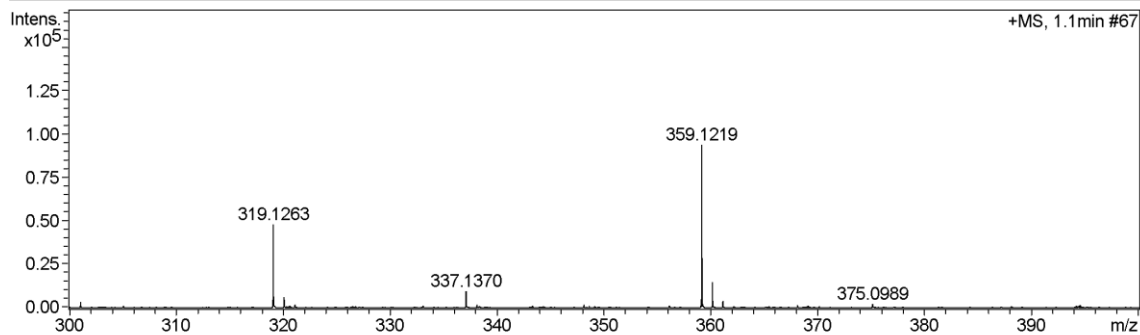

| Sum Formula            | Sigma | m/z      | Err [ppm] | Mean Err [ppm] | Err [mDa] | rdb  | N Rule | e <sup>-</sup> |
|------------------------|-------|----------|-----------|----------------|-----------|------|--------|----------------|
| C 16 H 20 N 2 Na 1 O 6 | 0.018 | 359.1214 | -1.41     | -0.94          | -0.51     | 7.50 | ok     | even           |

**Figure S19** The ECD spectrum of (+)-peganine B (**2a**) and (-)-peganine B (**2b**)

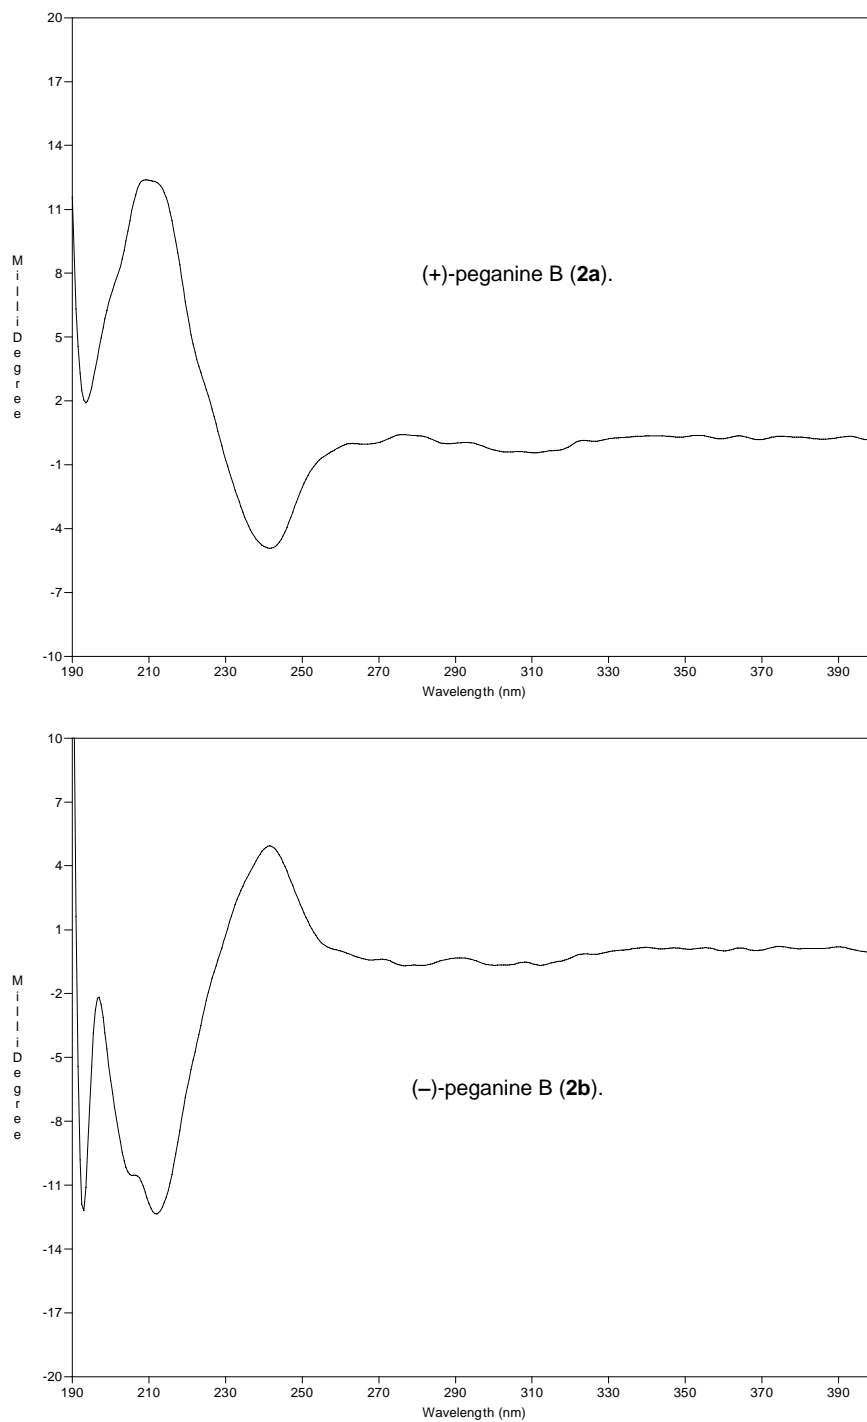

Figure S20 The  $^1\text{H}$  NMR spectrum of peganumal A (**3**) in  $\text{DMSO-}d_6$  (600 MHz)

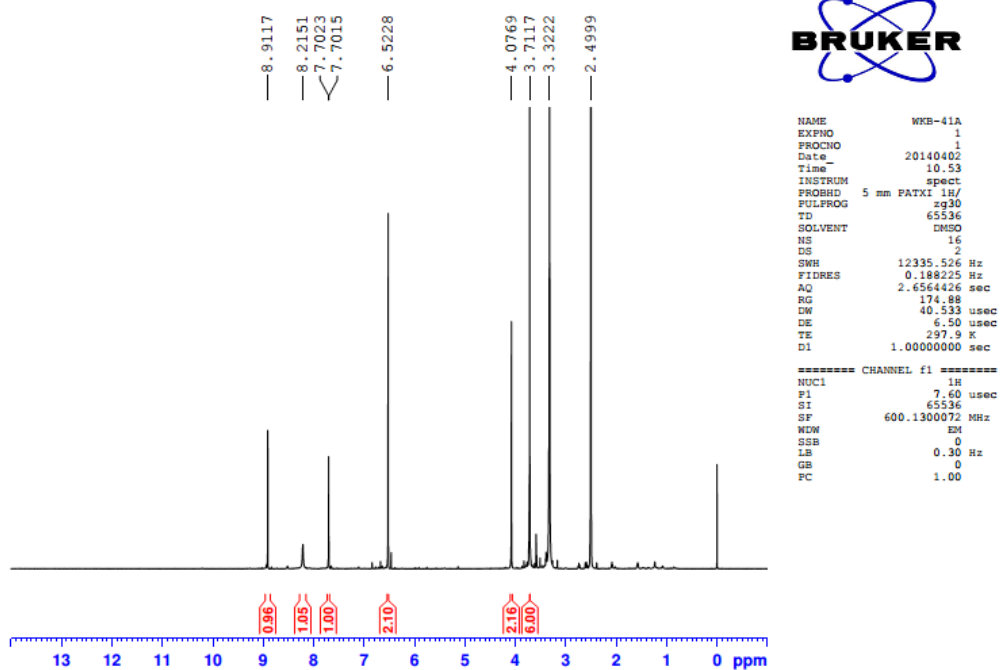

Figure S21 The  $^{13}\text{C}$  NMR spectrum of peganumal A (**3**) in  $\text{DMSO-}d_6$  (150 MHz)

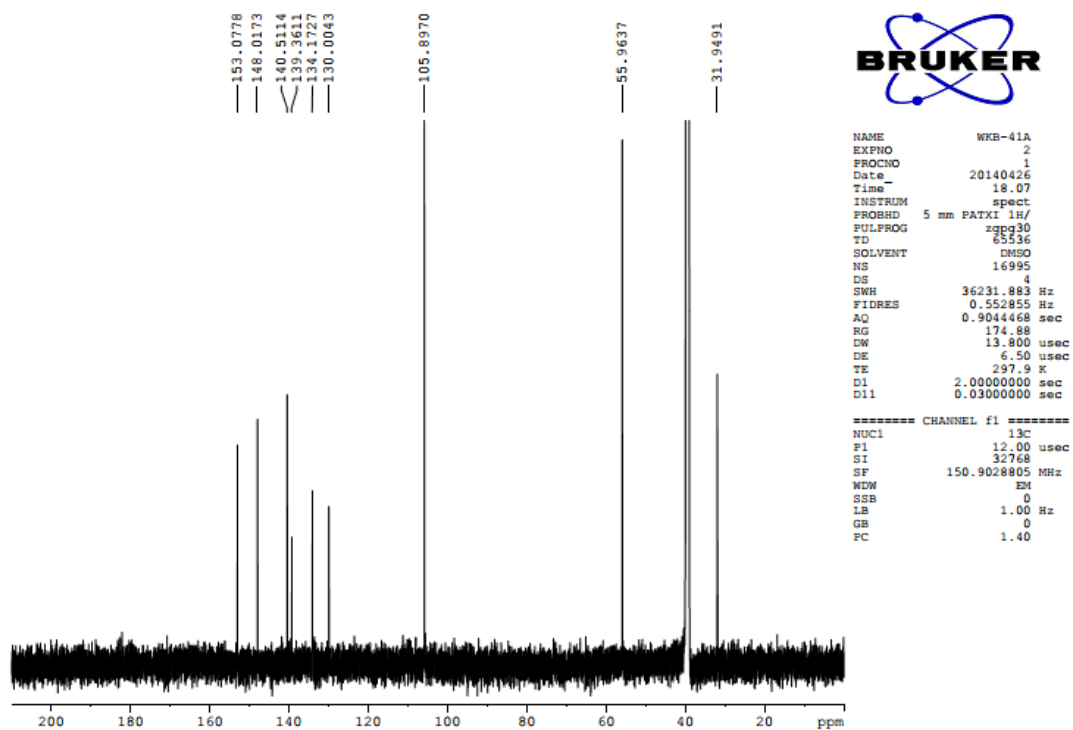

Figure S22 The HSQC spectrum of peganumal A (3) in DMSO-*d*<sub>6</sub> (600 MHz)

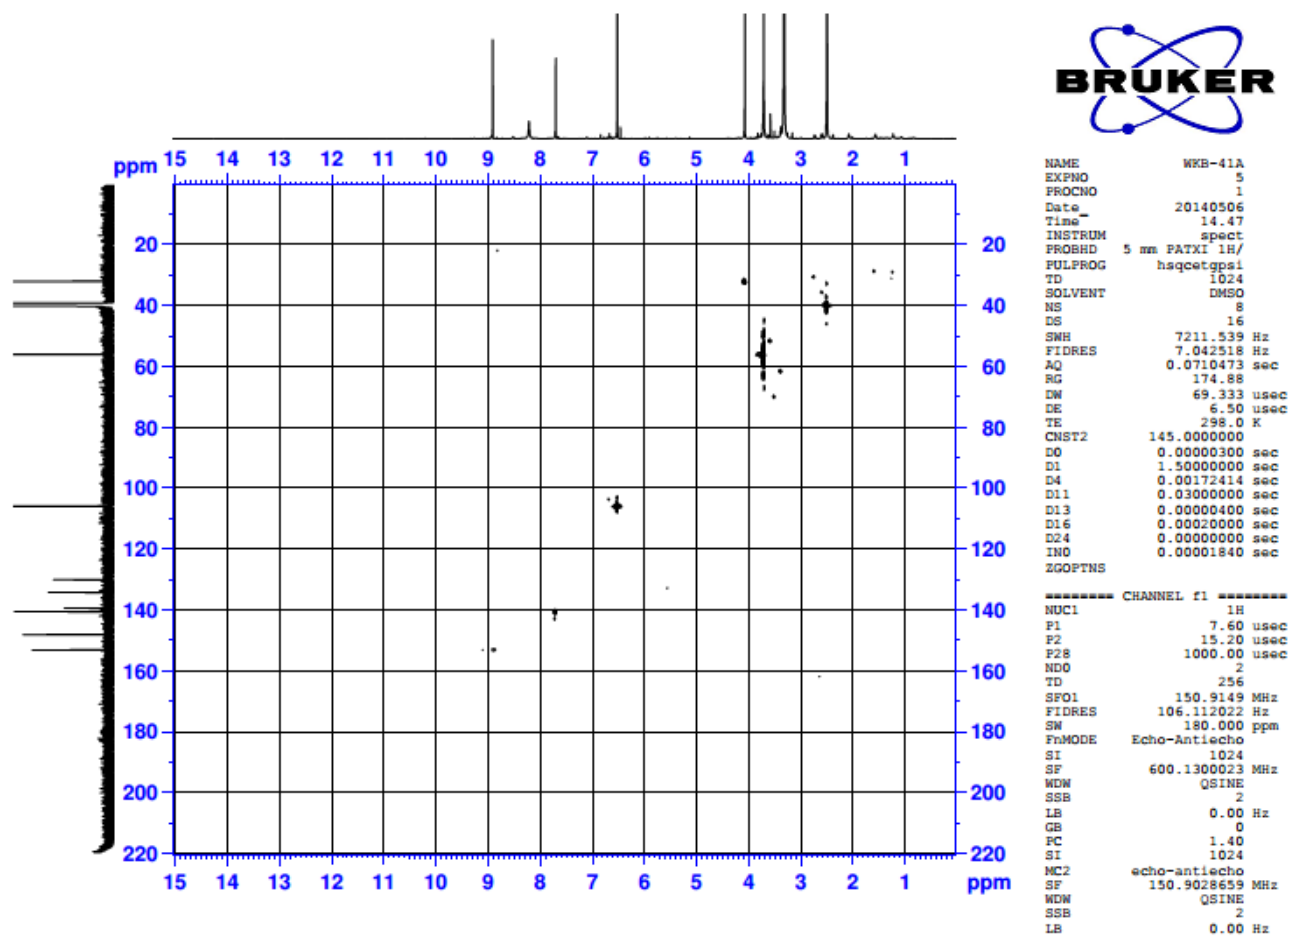



Figure S23 The HMBC spectrum of peganumal A (3) in DMSO-*d*<sub>6</sub> (600 MHz)

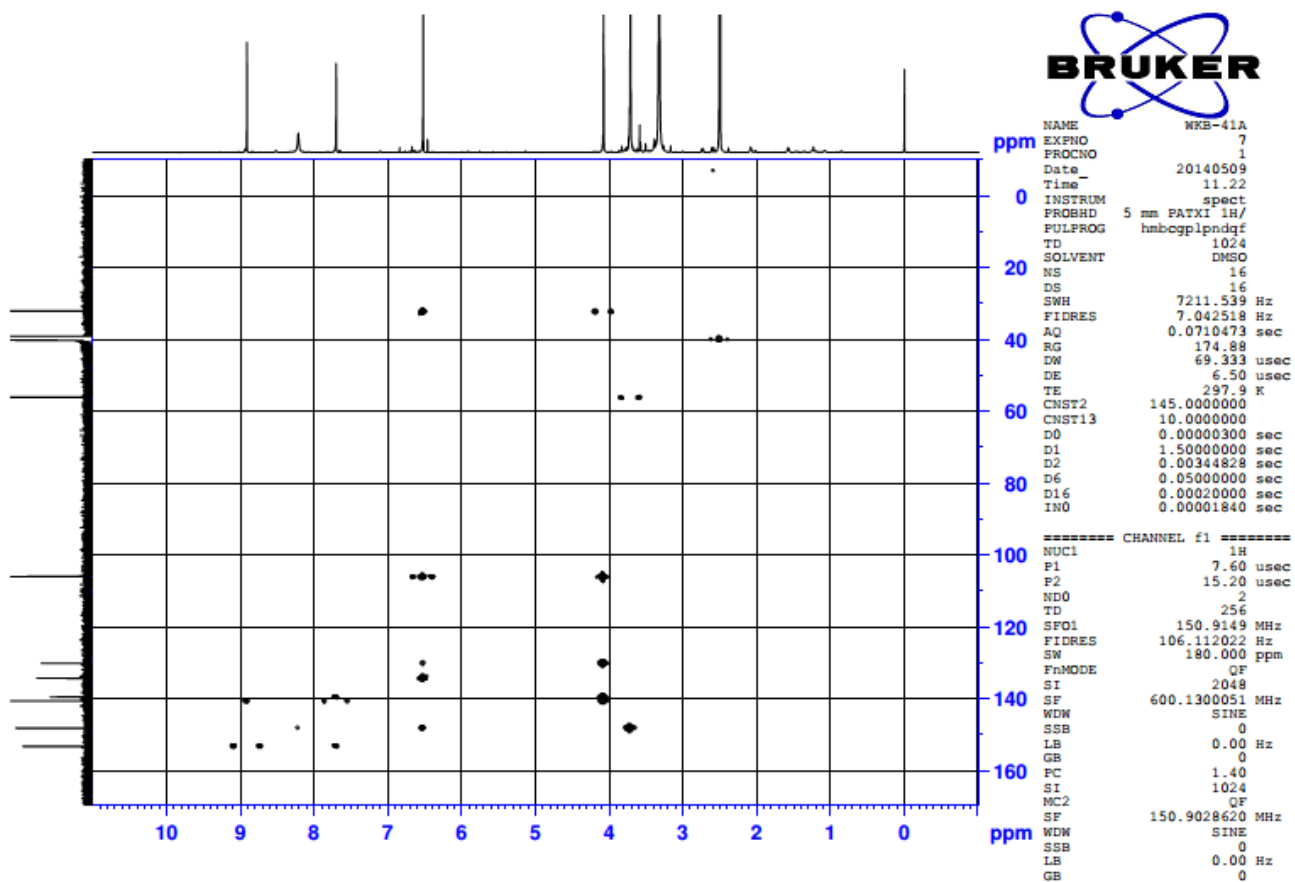

**Figure S24** The HRESIMS spectrum of peganumal A (3) in MeOH

## Mass Spectrum Molecular Formula Report

**Analysis Info**

Analysis Name D:\Data\20140514ceyang\WKB-41A.d  
 Method Liu\_low\_20131025.m  
 Sample Name WKB-41A  
 Comment

Acquisition Date 5/14/2014 1:59:47 PM

Operator Bruker Customer  
 Instrument / Ser# micrOTOF-Q 125

**Acquisition Parameter**

|             |          |                       |           |                  |           |
|-------------|----------|-----------------------|-----------|------------------|-----------|
| Source Type | ESI      | Ion Polarity          | Positive  | Set Nebulizer    | 0.3 Bar   |
| Focus       | Active   | Set Capillary         | 4500 V    | Set Dry Heater   | 180 °C    |
| Scan Begin  | 50 m/z   | Set End Plate Offset  | -500 V    | Set Dry Gas      | 4.0 l/min |
| Scan End    | 1000 m/z | Set Collision Cell RF | 300.0 Vpp | Set Divert Valve | Source    |

**Generate Molecular Formula Parameter**

|                  |                |                             |       |         |   |
|------------------|----------------|-----------------------------|-------|---------|---|
| Formula, min.    | C12H13N1O3S1Na |                             |       | Charge  | 1 |
| Formula, max.    |                |                             |       | Minimum | 0 |
| Measured m/z     | 274.052        | Tolerance                   | 5 ppm | Maximum | 0 |
| Check Valence    | no             | Electron Configuration both |       | Minimum | 0 |
| Nitrogen Rule    | no             |                             |       | Maximum | 3 |
| Filter H/C Ratio | no             |                             |       |         |   |
| Estimate Carbon  | yes            |                             |       |         |   |

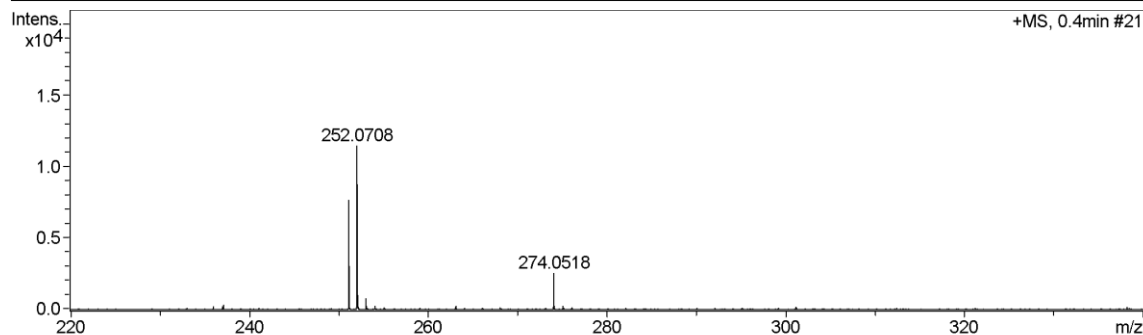

| Sum Formula                | Sigma | m/z      | Err [ppm] | Mean Err [ppm] | Err [mDa] | rdb  | N Rule | e <sup>-</sup> |
|----------------------------|-------|----------|-----------|----------------|-----------|------|--------|----------------|
| C 12 H 13 N 1 Na 1 O 3 S 1 | 0.048 | 274.0508 | -3.44     | -3.64          | -0.94     | 6.50 | ok     | even           |

Figure S25 The  $^1\text{H}$  NMR spectrum of peganumal B (4) in  $\text{DMSO-}d_6$  (400 MHz)

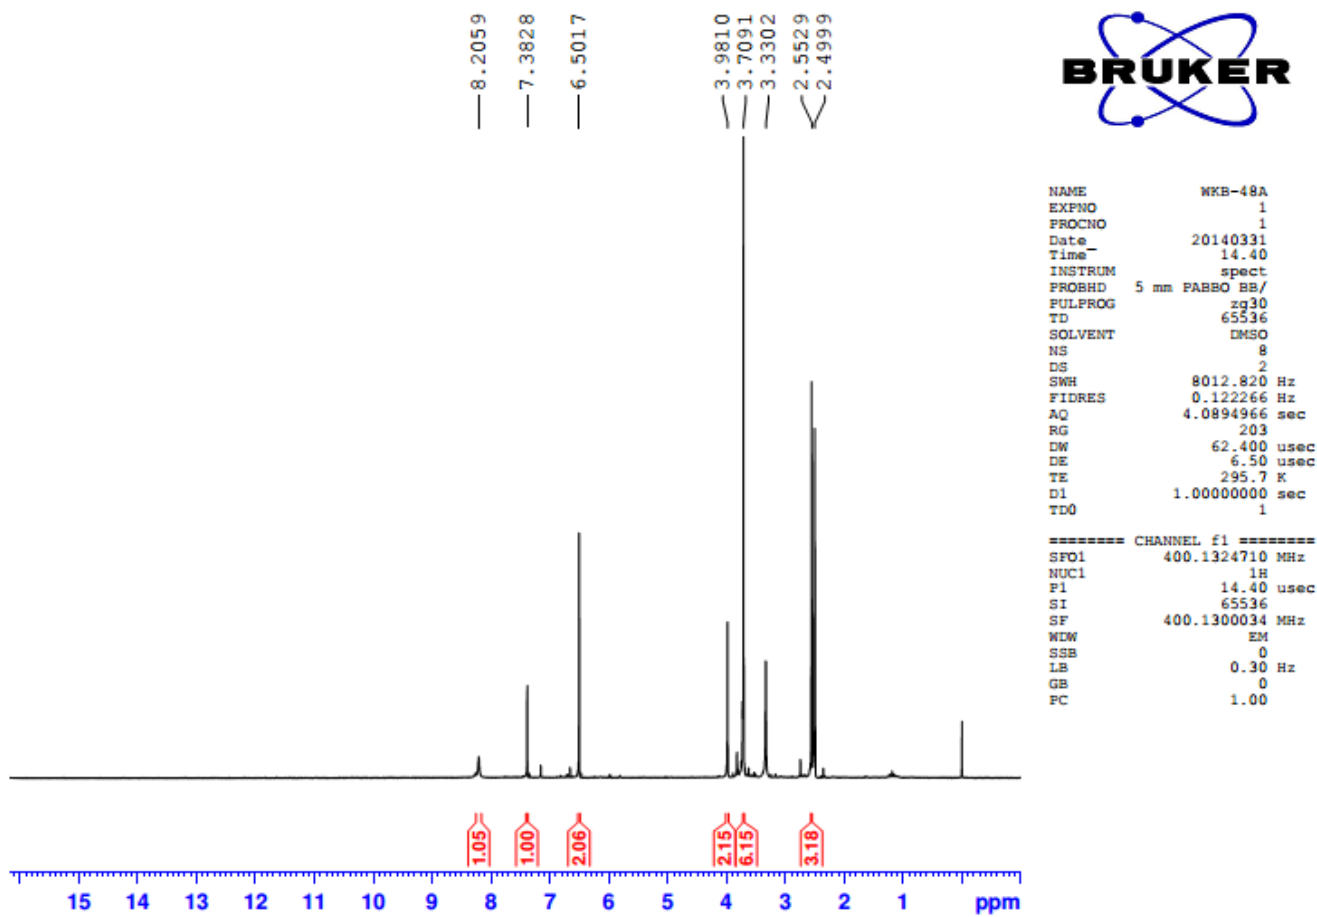

Figure S26 The  $^{13}\text{C}$  NMR spectrum of peganumal B (4) in  $\text{DMSO-}d_6$  (100 MHz)

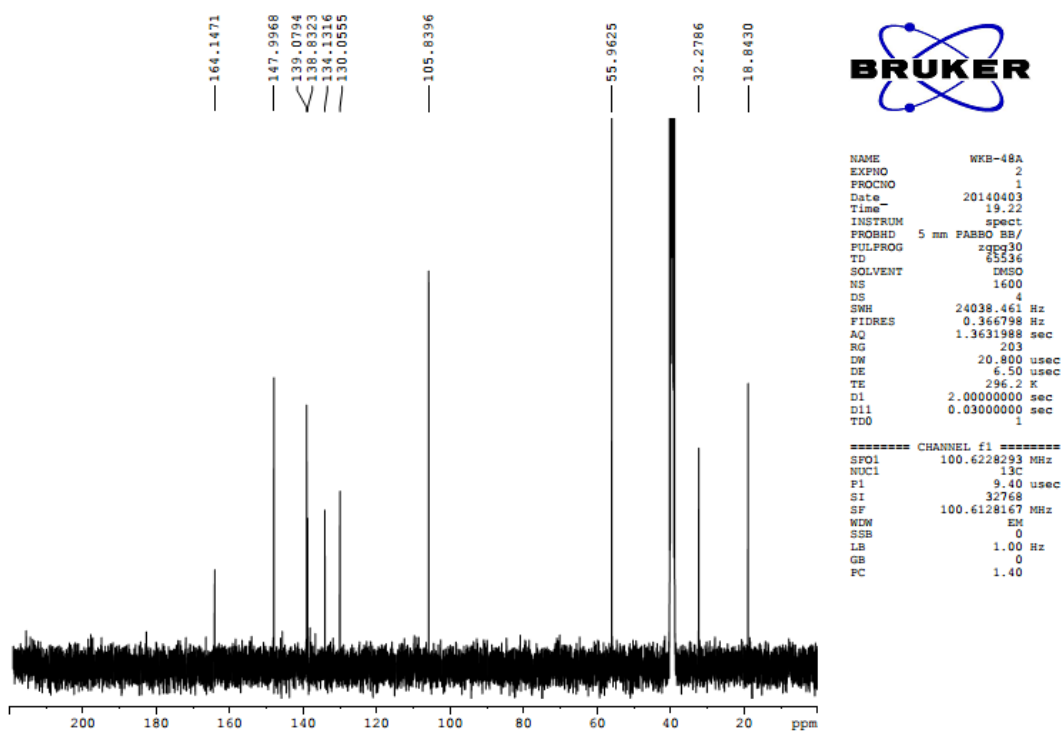

Figure S27 The HSQC spectrum of peganumal B (4) in DMSO-*d*<sub>6</sub> (600 MHz)

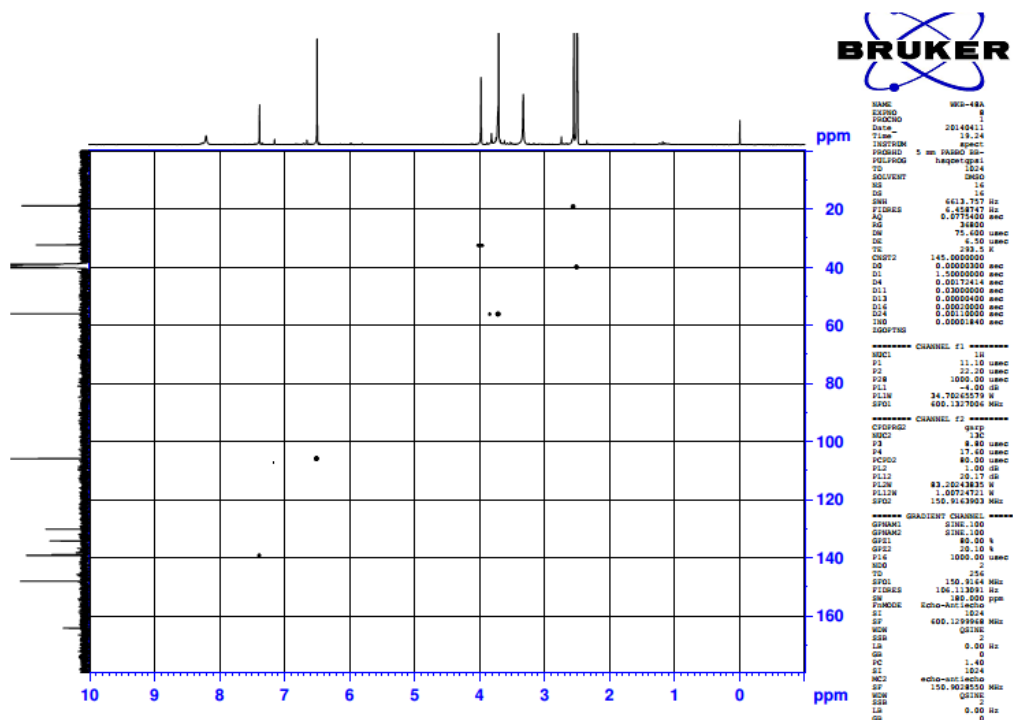

Figure S28 The HMBC spectrum of peganumal B (4) in DMSO-*d*<sub>6</sub> (600 MHz)

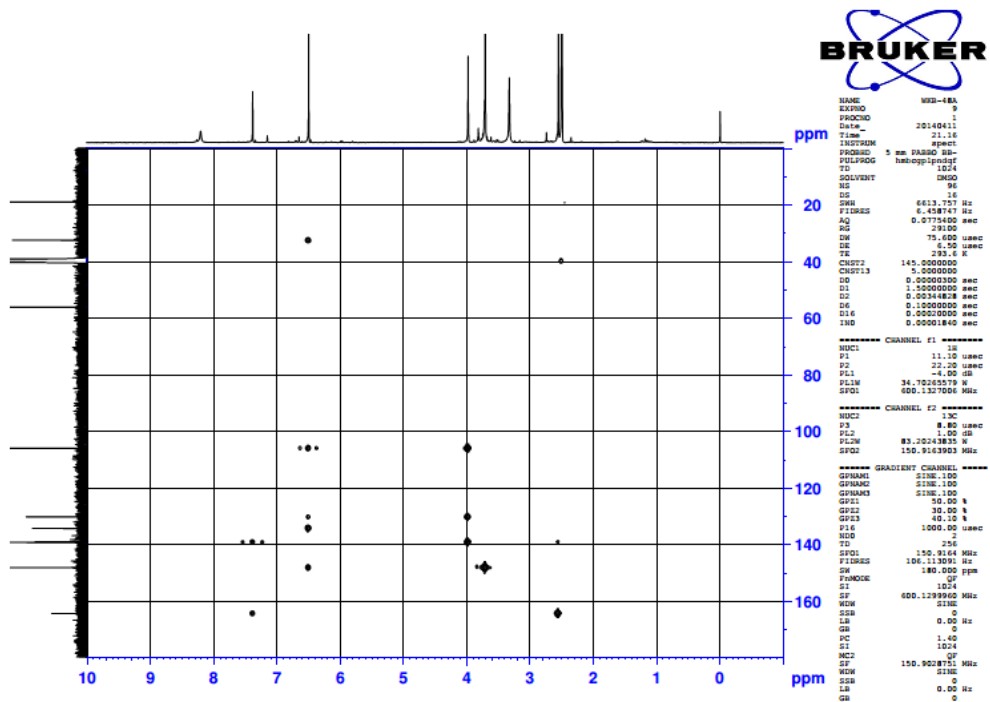

**Figure S29** The HRESIMS spectrum of peganumal B (**4**) in MeOH

## Mass Spectrum Molecular Formula Report

**Analysis Info**

Analysis Name D:\Data\20140430CEYANG\WKB-48A\_1-a,3\_01\_3262.d  
 Method 20131026\_ceyang.m  
 Sample Name WKB-48A  
 Comment

Acquisition Date 4/30/2014 2:06:24 PM

Operator Bruker Customer  
 Instrument / Ser# micrOTOF-Q 125

**Acquisition Parameter**

|             |          |                       |           |                  |           |
|-------------|----------|-----------------------|-----------|------------------|-----------|
| Source Type | ESI      | Ion Polarity          | Positive  | Set Nebulizer    | 1.2 Bar   |
| Focus       | Active   | Set Capillary         | 4500 V    | Set Dry Heater   | 180 °C    |
| Scan Begin  | 50 m/z   | Set End Plate Offset  | -500 V    | Set Dry Gas      | 8.0 l/min |
| Scan End    | 1000 m/z | Set Collision Cell RF | 300.0 Vpp | Set Divert Valve | Source    |

**Generate Molecular Formula Parameter**

|                  |               |                             |       |         |   |
|------------------|---------------|-----------------------------|-------|---------|---|
| Formula, min.    | C13H15N1O3S1H |                             |       |         |   |
| Formula, max.    |               |                             |       |         |   |
| Measured m/z     | 266.086       | Tolerance                   | 5 ppm | Charge  | 1 |
| Check Valence    | no            | Minimum                     | 0     | Maximum | 0 |
| Nirogen Rule     | yes           | Electron Configuration both |       |         |   |
| Filter H/C Ratio | no            | Minimum                     | 0     | Maximum | 3 |
| Estimate Carbon  | yes           |                             |       |         |   |

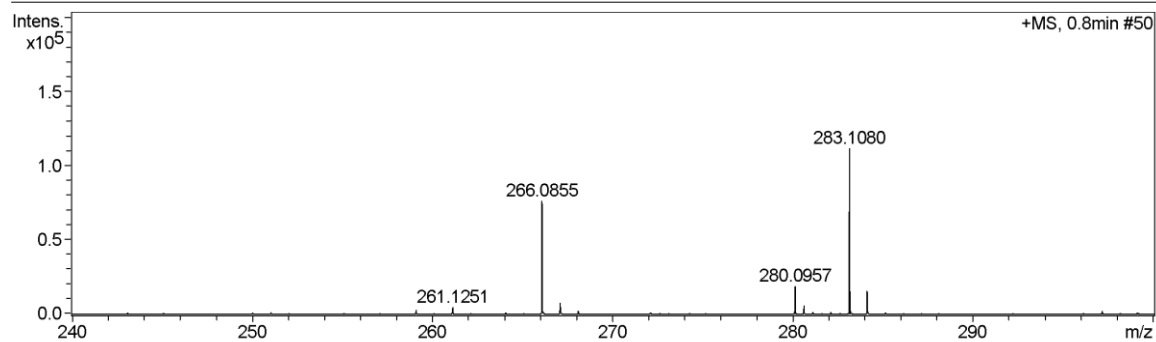

| Sum Formula           | Sigma | m/z      | Err [ppm] | Mean Err [ppm] | Err [mDa] | rdb  | N Rule | e <sup>-</sup> |
|-----------------------|-------|----------|-----------|----------------|-----------|------|--------|----------------|
| C 13 H 16 N 1 O 3 S 1 | 0.036 | 266.0845 | -3.50     | -5.40          | -0.93     | 6.50 | ok     | even           |

Figure S30 The  $^1\text{H}$  NMR spectrum of pegaharminine F (**5**) in  $\text{DMSO-}d_6$  (600 MHz)

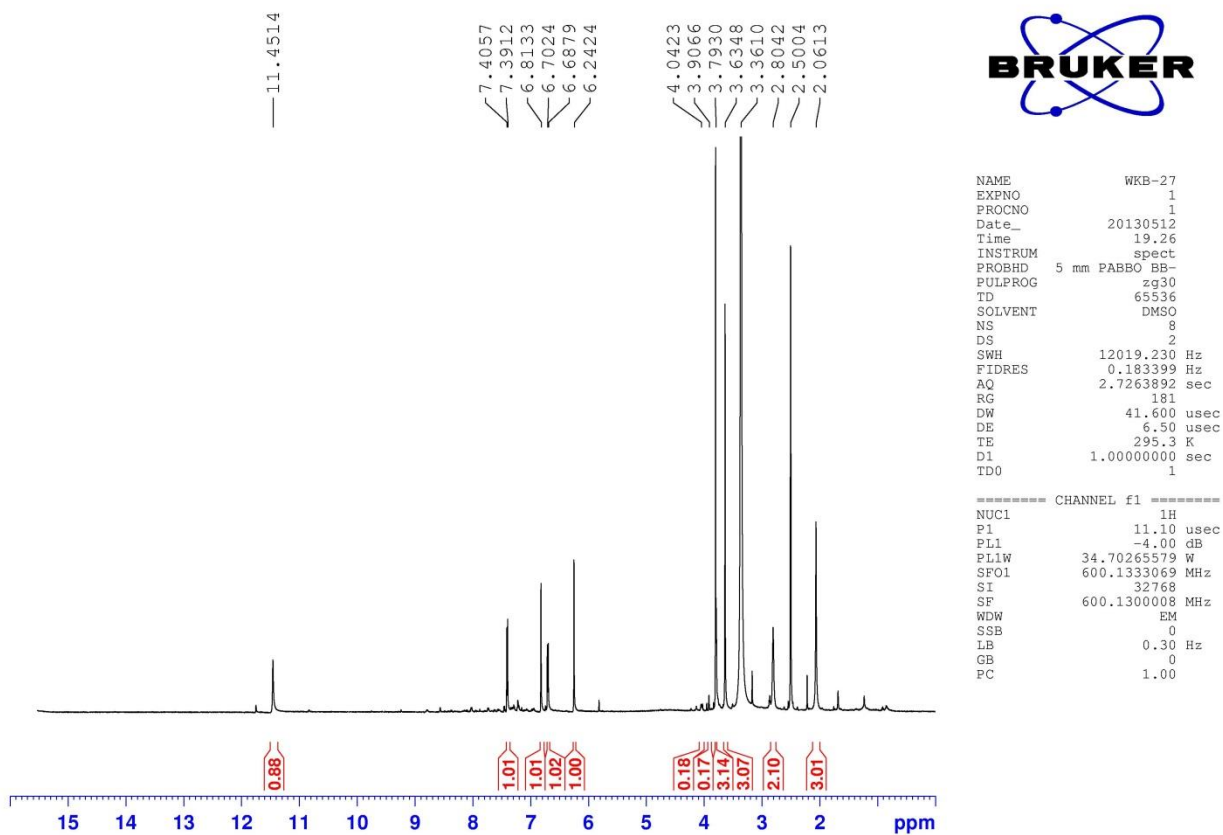



Figure S31 The  $^{13}\text{C}$  NMR spectrum of pegaharmine F (5) in  $\text{DMSO-}d_6$  (100 MHz)

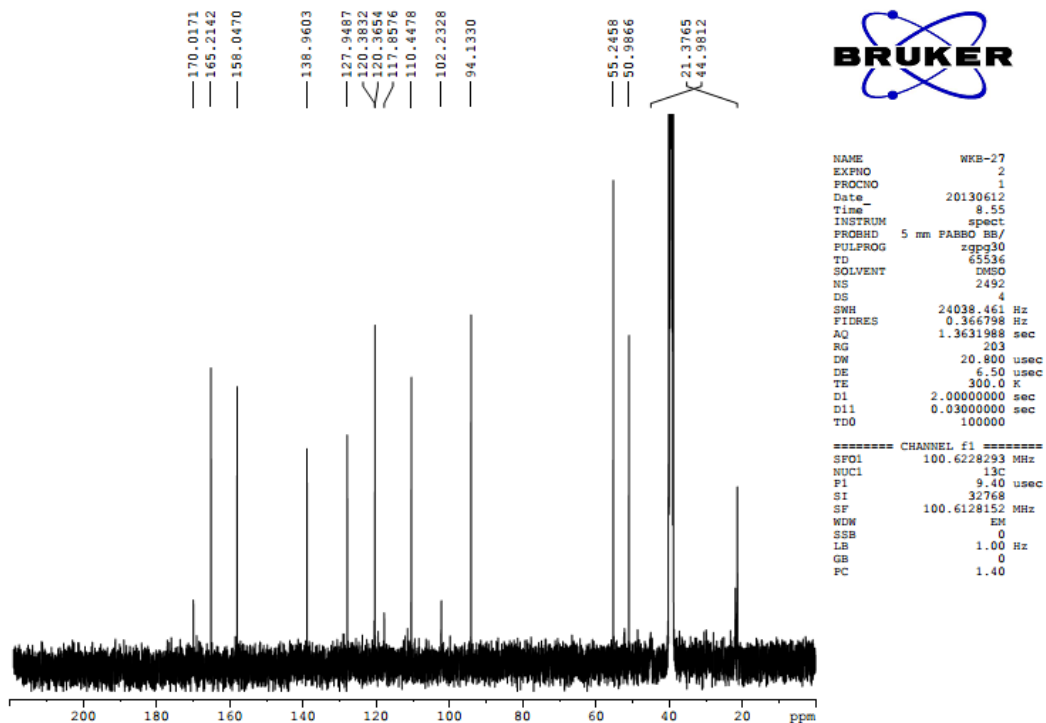

Figure S32 The HSQC spectrum of pegaharminine F (5) in DMSO-*d*<sub>6</sub> (600 MHz)

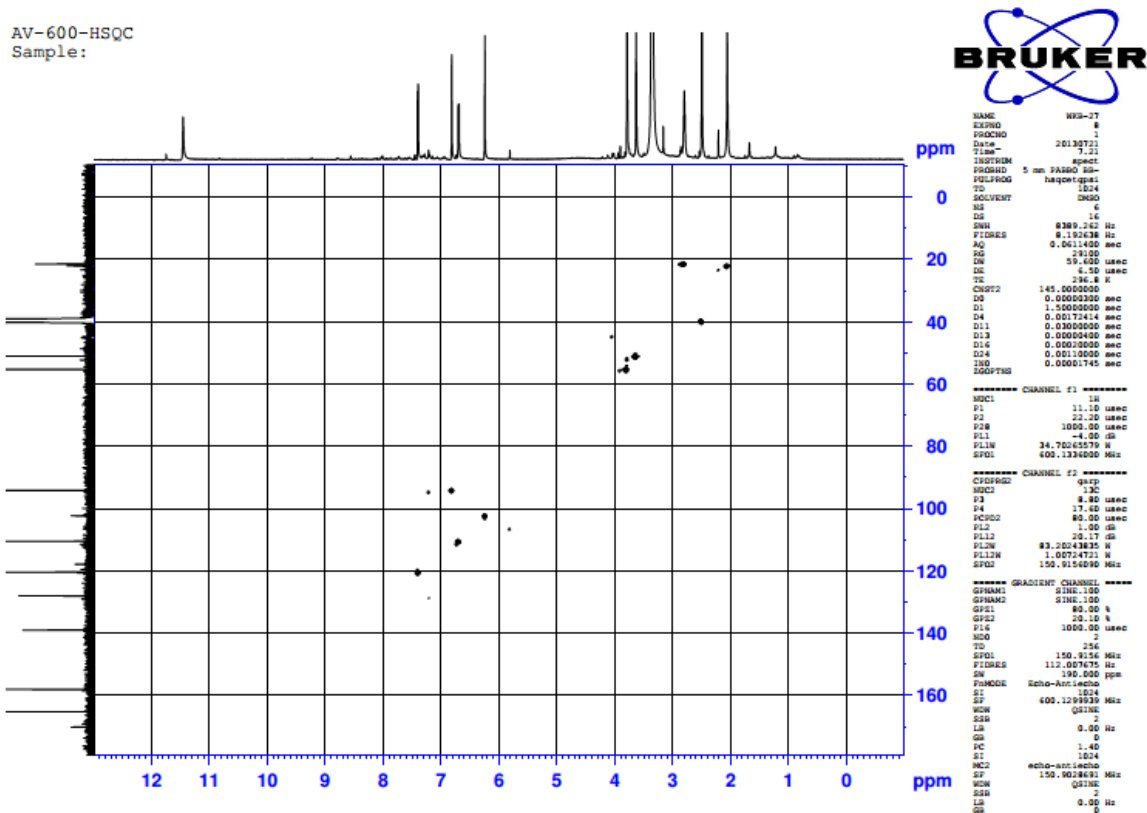

Figure S33 The HMBC spectrum of pegaharminine F (5) in DMSO-*d*<sub>6</sub> (600 MHz)

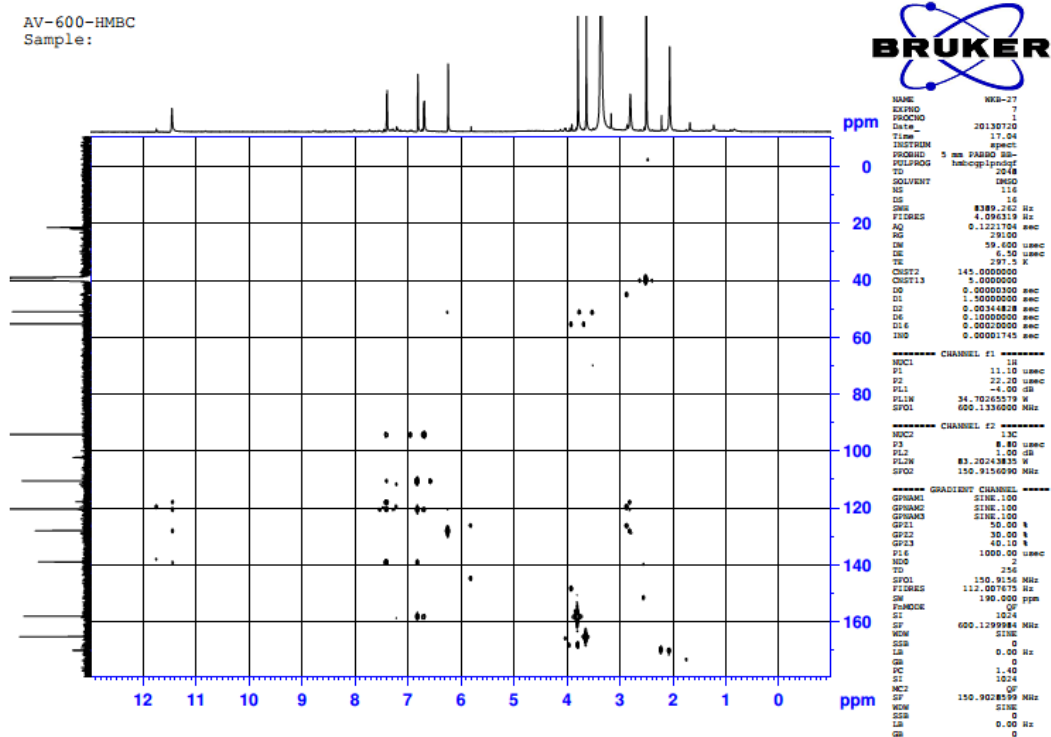

**Figure S34** The HRESIMS spectrum of pegaharmine F (5) in MeOH

## Mass Spectrum Molecular Formula Report

**Analysis Info**

Analysis Name  
 Method  
 Sample Name  
 Comment

Acquisition Date 6/6/2014 9:00:50 AM  
 Operator Bruker Customer  
 Instrument / Ser# micrOTOF-Q 125

**Acquisition Parameter**

|             |          |                       |           |                  |           |
|-------------|----------|-----------------------|-----------|------------------|-----------|
| Source Type | ESI      | Ion Polarity          | Positive  | Set Nebulizer    | 1.2 Bar   |
| Focus       | Active   | Set Capillary         | 4500 V    | Set Dry Heater   | 180 °C    |
| Scan Begin  | 50 m/z   | Set End Plate Offset  | -500 V    | Set Dry Gas      | 8.0 l/min |
| Scan End    | 1000 m/z | Set Collision Cell RF | 300.0 Vpp | Set Divert Valve | Source    |

**Generate Molecular Formula Parameter**

|                  |              |                             |       |         |   |
|------------------|--------------|-----------------------------|-------|---------|---|
| Formula, min.    | C17H18N2O4Na |                             |       |         |   |
| Formula, max.    |              |                             |       |         |   |
| Measured m/z     | 337.117      | Tolerance                   | 5 ppm | Charge  | 1 |
| Check Valence    | no           | Minimum                     | 0     | Maximum | 0 |
| Nitrogen Rule    | no           | Electron Configuration both |       |         |   |
| Filter H/C Ratio | no           | Minimum                     | 0     | Maximum | 3 |
| Estimate Carbon  | yes          |                             |       |         |   |

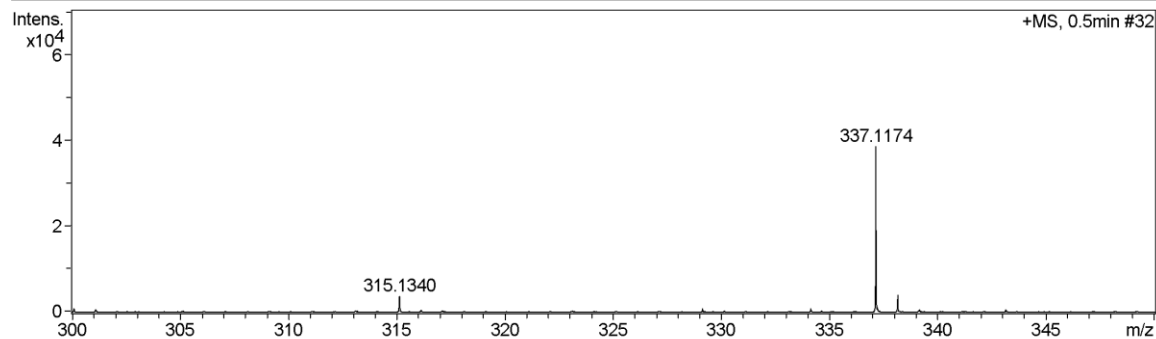

| Sum Formula            | Sigma | m/z      | Err [ppm] | Mean Err [ppm] | Err [mDa] | rdb  | N Rule | e <sup>-</sup> |
|------------------------|-------|----------|-----------|----------------|-----------|------|--------|----------------|
| C 17 H 18 N 2 Na 1 O 4 | 0.054 | 337.1159 | -4.55     | -3.09          | -1.53     | 9.50 | ok     | even           |

Figure S35 The  $^1\text{H}$  NMR spectrum of pegaharminine G (**6**) in  $\text{DMSO-}d_6$  (600 MHz)

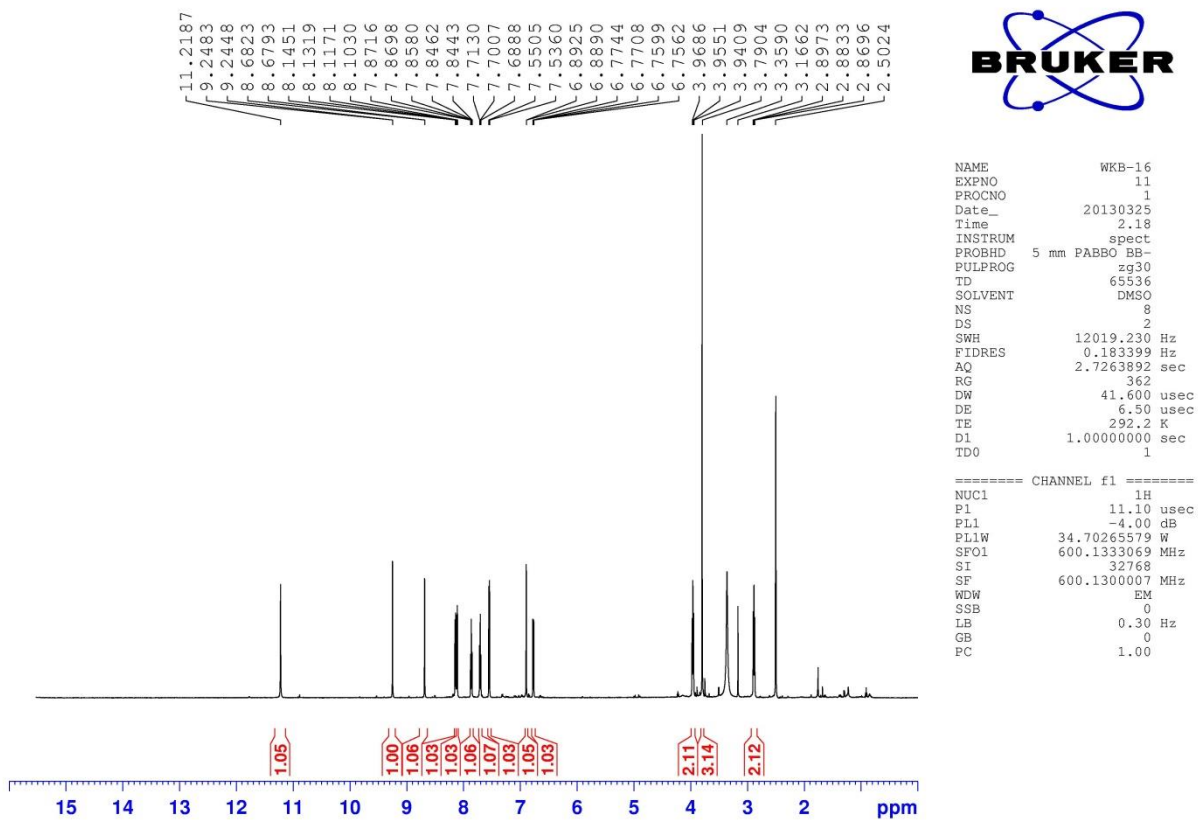

Figure S36 The  $^{13}\text{C}$  NMR spectrum of pegaharmine G (**6**) in  $\text{DMSO-}d_6$  (150 MHz)

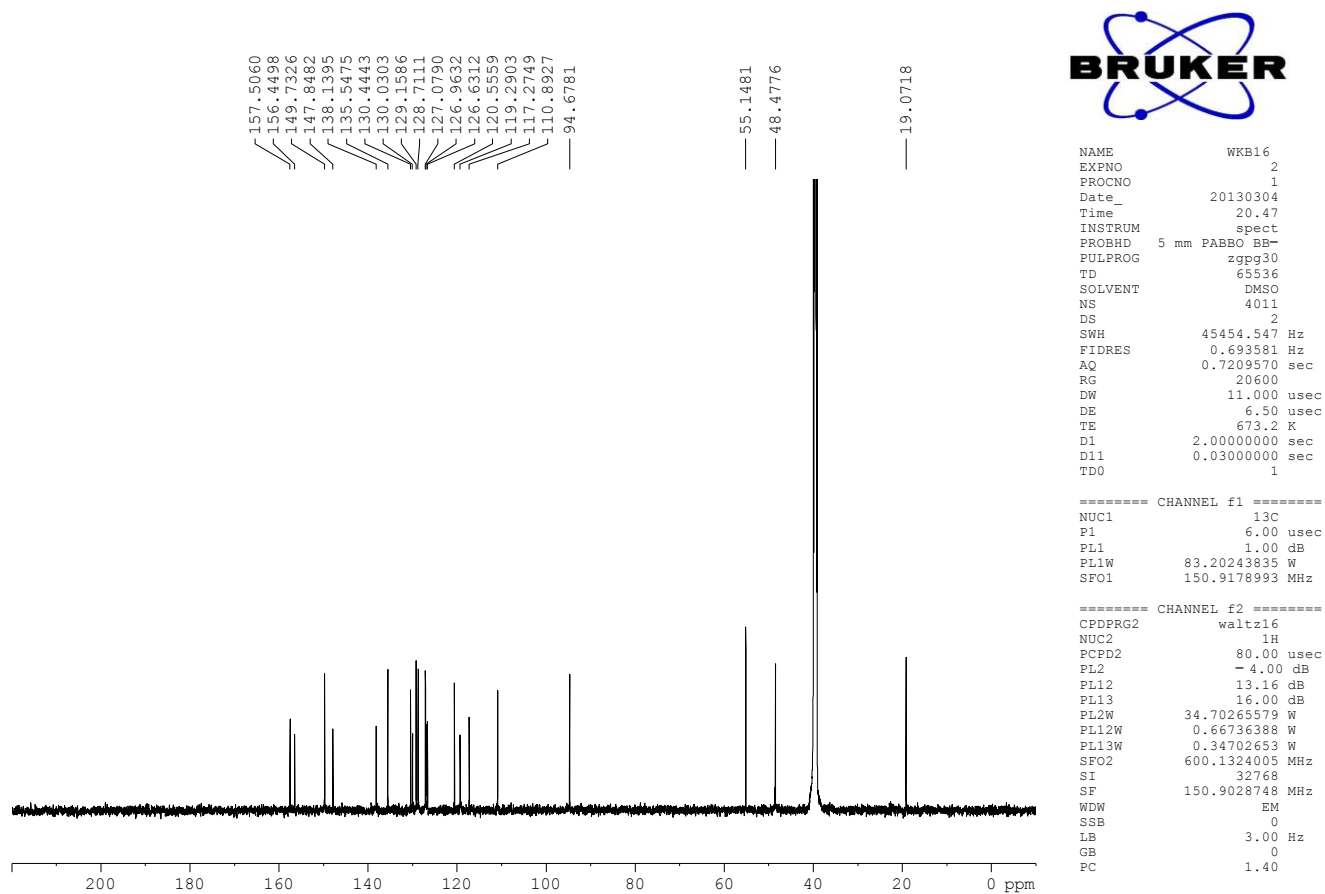

Figure S37 The HSQC spectrum of pegaharmino G (6) in DMSO-*d*<sub>6</sub> (600 MHz)

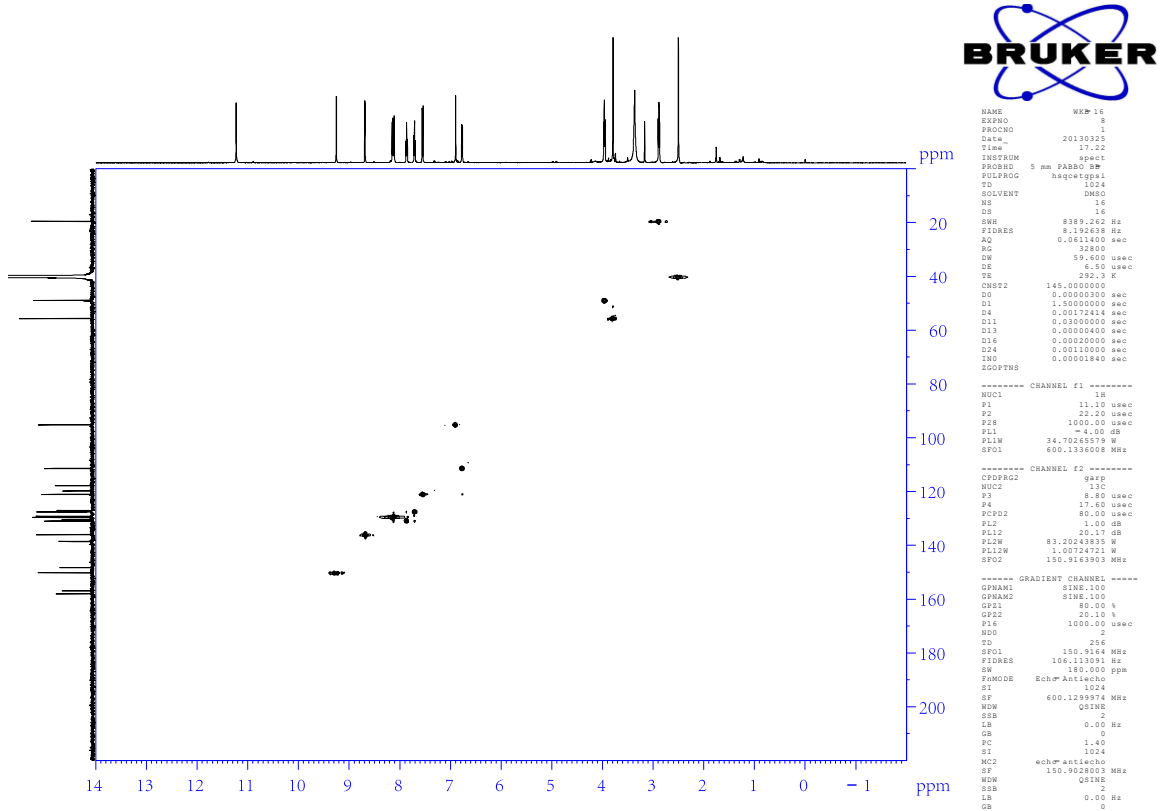





**Figure S39** The HRESIMS spectrum of pegaharmine G (6) in MeOH

## Mass Spectrum Molecular Formula Report

**Analysis Info**

Analysis Name D:\Data\20130328\WKB-16.d  
 Method LIU 250-550POS.m  
 Sample Name WKB-16  
 Comment

Acquisition Date 3/28/2013 3:31:37 PM

Operator Bruker Customer  
 Instrument / Ser# micrOTOF-Q 125

**Acquisition Parameter**

|             |            |                       |           |                  |           |
|-------------|------------|-----------------------|-----------|------------------|-----------|
| Source Type | ESI        | Ion Polarity          | Positive  | Set Nebulizer    | 0.3 Bar   |
| Focus       | Not active | Set Capillary         | 4500 V    | Set Dry Heater   | 180 °C    |
| Scan Begin  | 50 m/z     | Set End Plate Offset  | -500 V    | Set Dry Gas      | 4.0 l/min |
| Scan End    | 3000 m/z   | Set Collision Cell RF | 250.0 Vpp | Set Divert Valve | Source    |

**Generate Molecular Formula Parameter**

|                  |            |                        |       |         |   |
|------------------|------------|------------------------|-------|---------|---|
| Formula, min.    | C21H18N3O1 |                        |       |         |   |
| Formula, max.    |            |                        |       |         |   |
| Measured m/z     | 328.144    | Tolerance              | 5 ppm | Charge  | 1 |
| Check Valence    | no         | Minimum                | 0     | Maximum | 0 |
| Nitrogen Rule    | no         | Electron Configuration | both  |         |   |
| Filter H/C Ratio | no         | Minimum                | 0     | Maximum | 3 |
| Estimate Carbon  | yes        |                        |       |         |   |

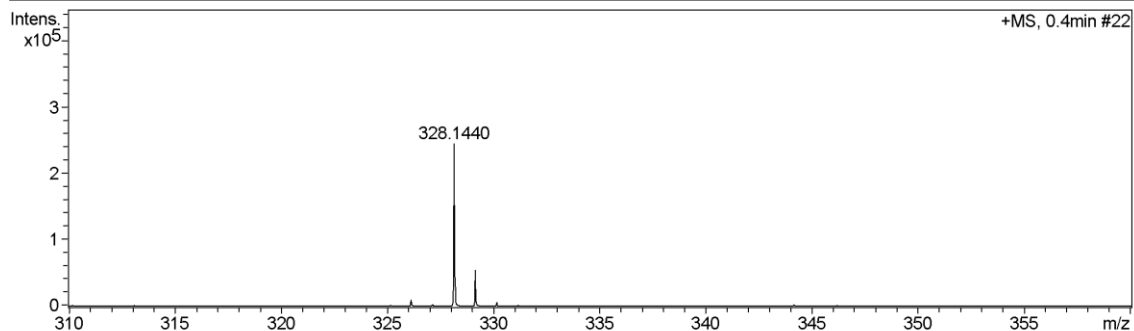

| Sum Formula       | Sigma | m/z      | Err [ppm] | Mean Err [ppm] | Err [mDa] | rdb   | N Rule | e <sup>-</sup> |
|-------------------|-------|----------|-----------|----------------|-----------|-------|--------|----------------|
| C 21 H 18 N 3 O 1 | 0.014 | 328.1444 | 1.32      | 1.69           | 0.43      | 14.50 | ok     | even           |

Figure S40 The  $^1\text{H}$  NMR spectrum of pegaharmino H (7) in  $\text{DMSO}-d_6$  (600 MHz)

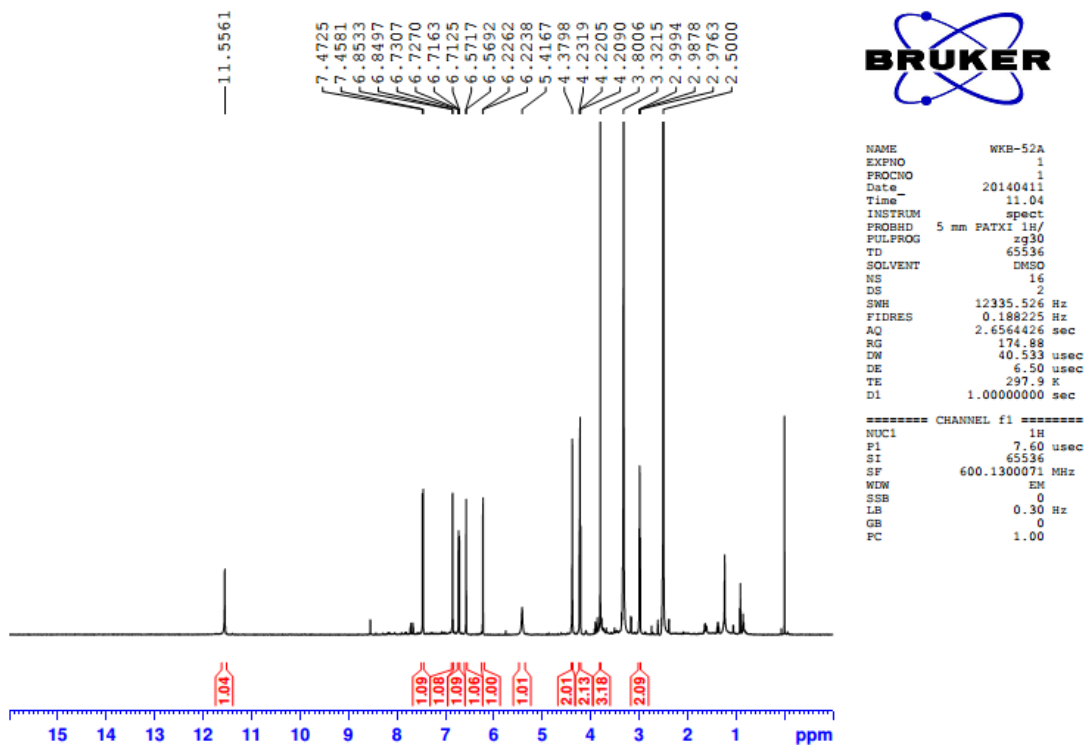

Figure S41 The  $^{13}\text{C}$  NMR spectrum of pegaharmine H (7) in  $\text{DMSO-}d_6$  (150 MHz)

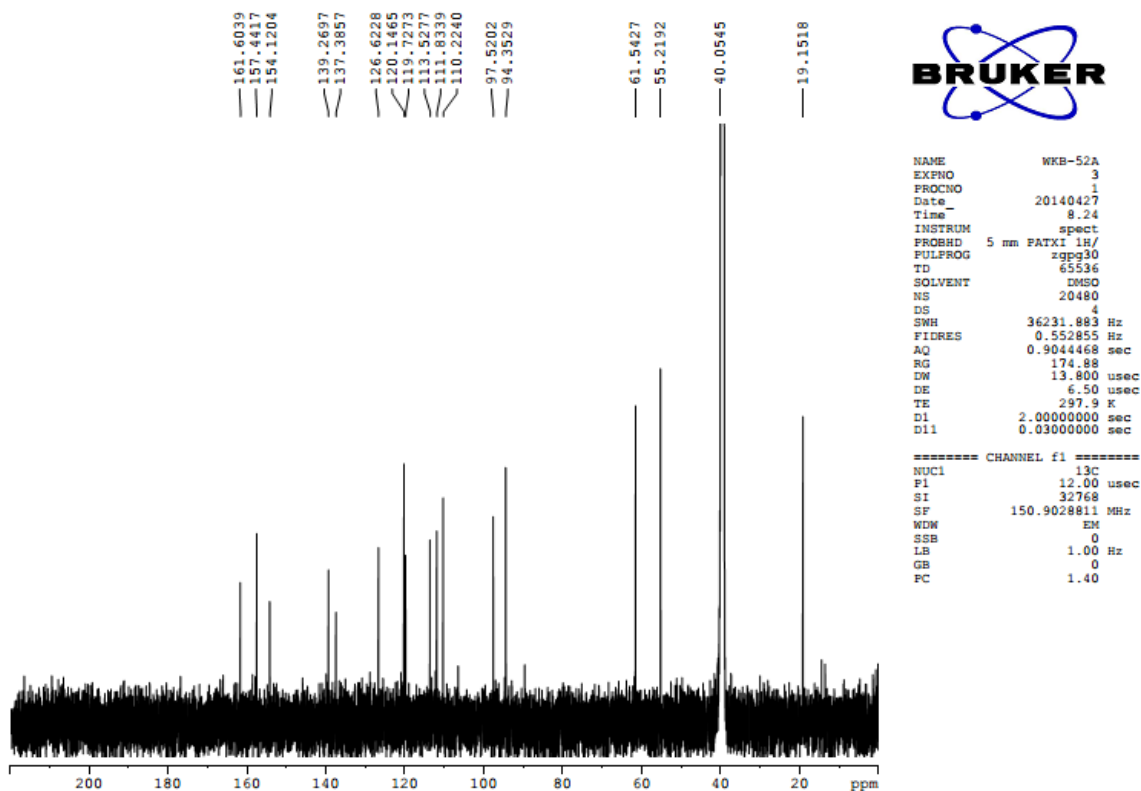

Figure S42 The HSQC spectrum of pegaharminine H (7) in DMSO-*d*<sub>6</sub> (600 MHz)

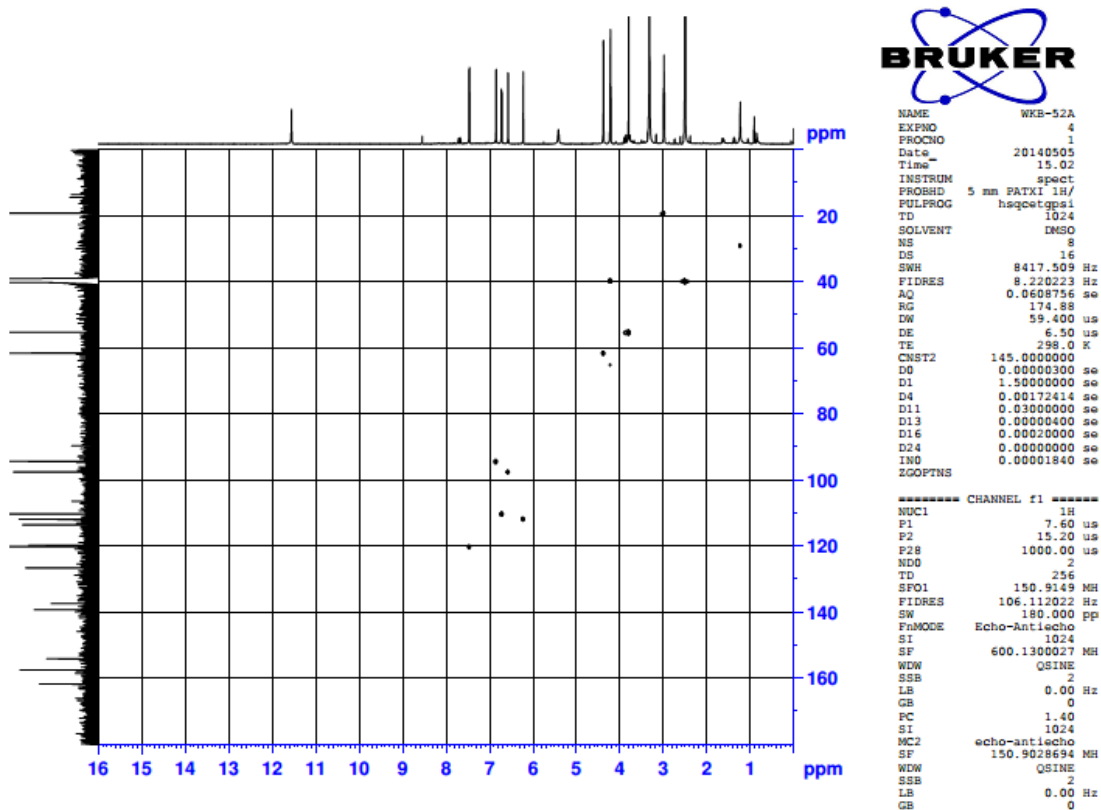

Figure S43 The HMBC spectrum of pegaharmine H (7) in DMSO-*d*<sub>6</sub> (600 MHz)

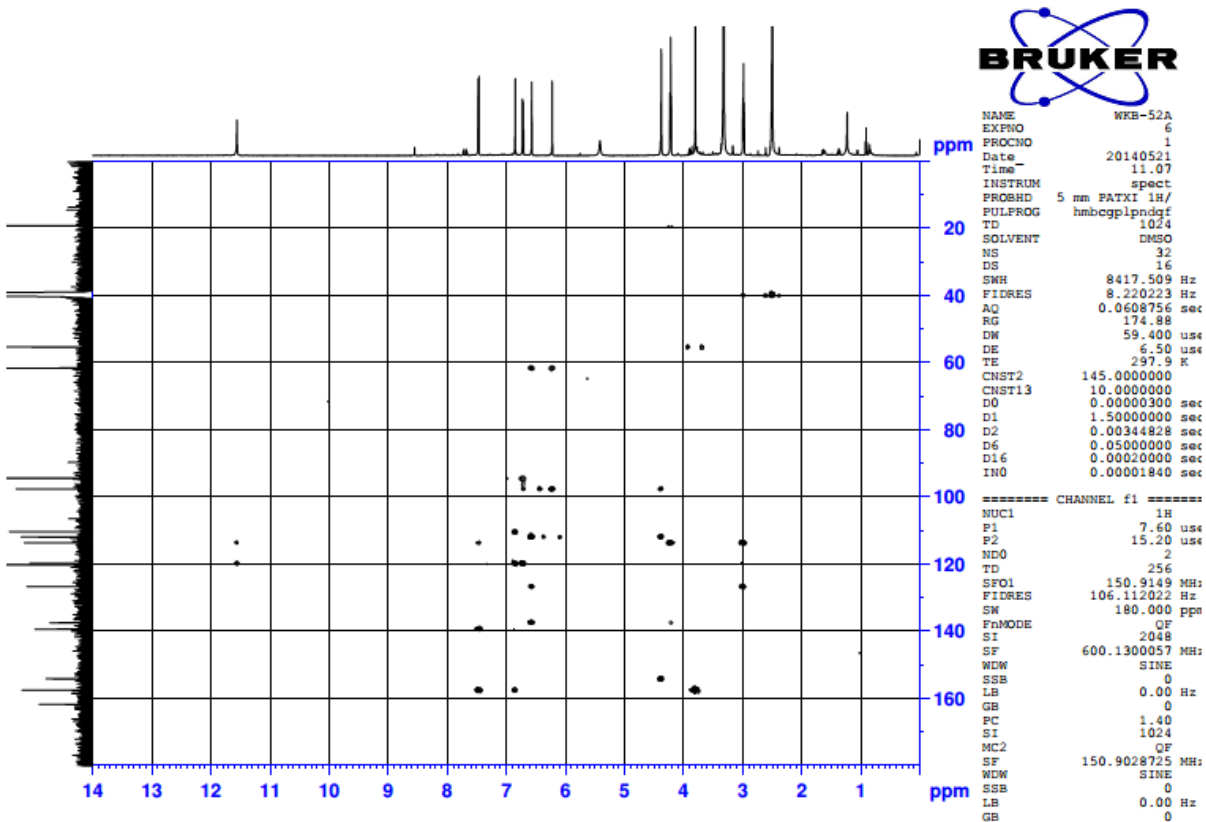

**Figure S44** The HRESIMS spectrum of pegaharmine H (7) in MeOH

## Mass Spectrum Molecular Formula Report

**Analysis Info**

Analysis Name D:\Data\20140516CEYANG\WKB-52A.d  
 Method Liu\_low\_20131025.m  
 Sample Name WKB-52A  
 Comment

Acquisition Date 5/16/2014 7:34:28 PM

Operator Bruker Customer  
 Instrument / Ser# micrOTOF-Q 125

**Acquisition Parameter**

|             |          |                       |           |                  |           |
|-------------|----------|-----------------------|-----------|------------------|-----------|
| Source Type | ESI      | Ion Polarity          | Positive  | Set Nebulizer    | 0.3 Bar   |
| Focus       | Active   | Set Capillary         | 4500 V    | Set Dry Heater   | 180 °C    |
| Scan Begin  | 50 m/z   | Set End Plate Offset  | -500 V    | Set Dry Gas      | 2.0 l/min |
| Scan End    | 1000 m/z | Set Collision Cell RF | 300.0 Vpp | Set Divert Valve | Source    |

**Generate Molecular Formula Parameter**

|                  |             |                             |       |         |   |
|------------------|-------------|-----------------------------|-------|---------|---|
| Formula, min.    | C17H16N2O3H |                             |       |         |   |
| Formula, max.    |             |                             |       |         |   |
| Measured m/z     | 297.124     | Tolerance                   | 5 ppm | Charge  | 1 |
| Check Valence    | no          | Minimum                     | 0     | Maximum | 0 |
| Nitrogen Rule    | no          | Electron Configuration both |       |         |   |
| Filter H/C Ratio | no          | Minimum                     | 0     | Maximum | 3 |
| Estimate Carbon  | yes         |                             |       |         |   |

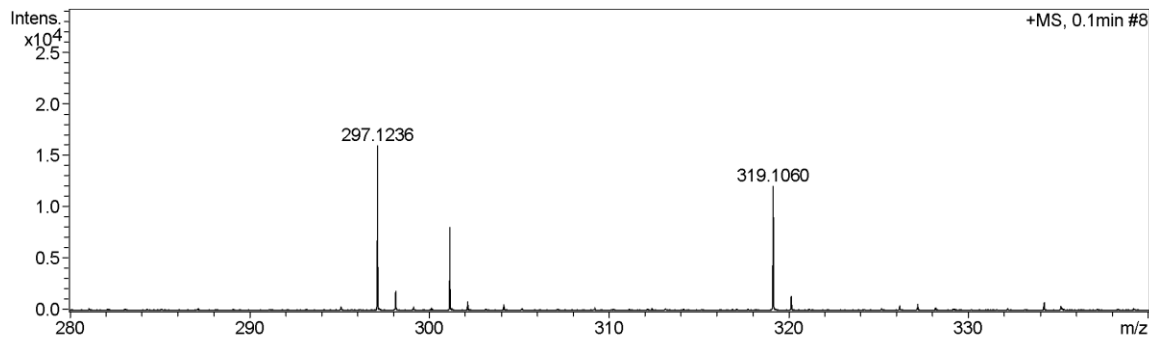

| Sum Formula       | Sigma | m/z      | Err [ppm] | Mean Err [ppm] | Err [mDa] | rdb   | N Rule | e <sup>-</sup> |
|-------------------|-------|----------|-----------|----------------|-----------|-------|--------|----------------|
| C 17 H 17 N 2 O 3 | 0.046 | 297.1234 | -0.93     | -2.04          | -0.28     | 10.50 | ok     | even           |

Figure S45 The  $^1\text{H}$  NMR spectrum of pegaharminine I (**8**) in  $\text{DMSO-}d_6$  (400 MHz)

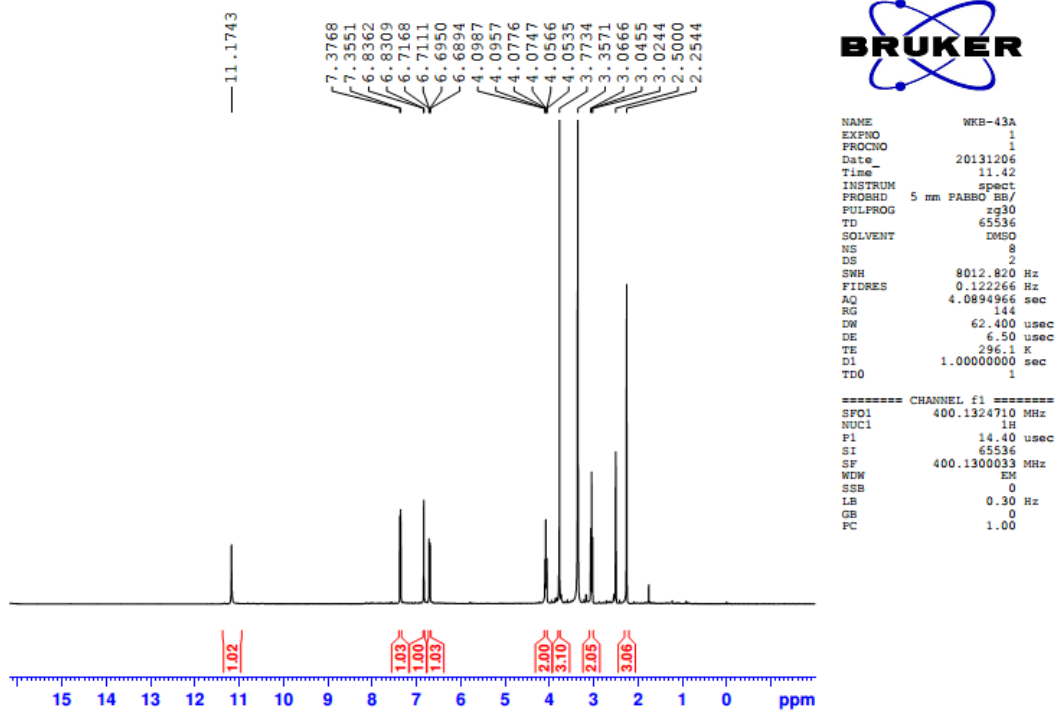

Figure S46 The  $^{13}\text{C}$  NMR spectrum of pegaharmine I (**8**) in  $\text{DMSO-}d_6$  (100 MHz)

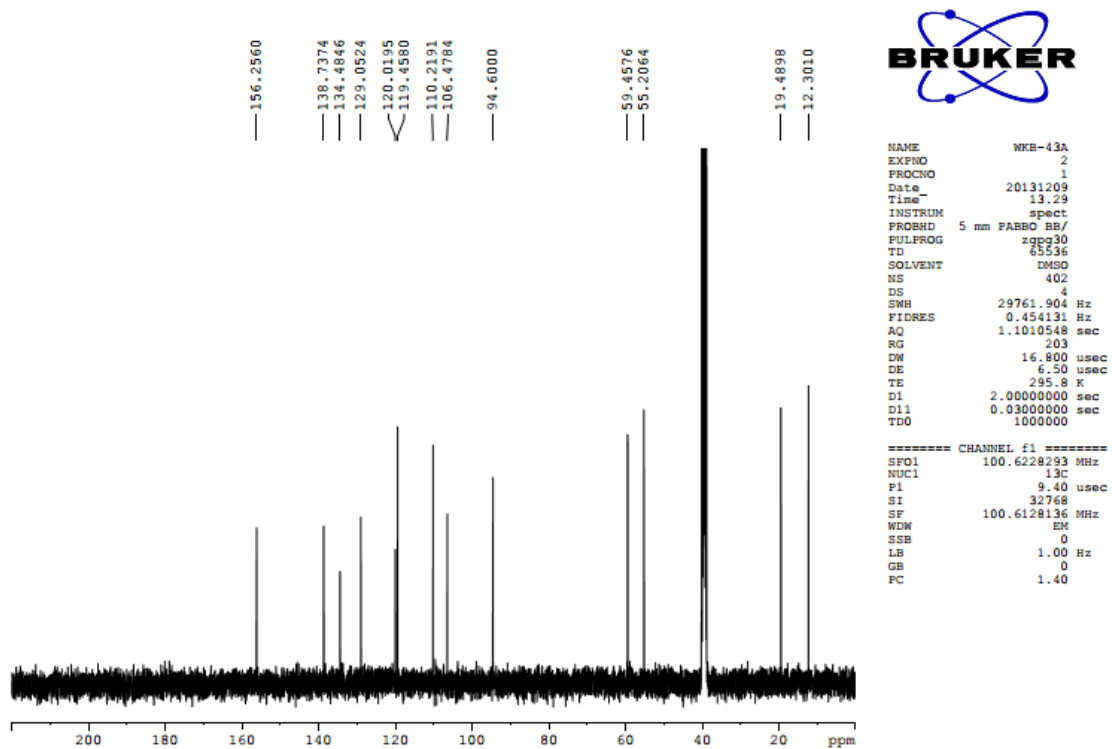



Figure S47 The HSQC spectrum of pegaharmine I (8) in DMSO-*d*<sub>6</sub> (600 MHz)

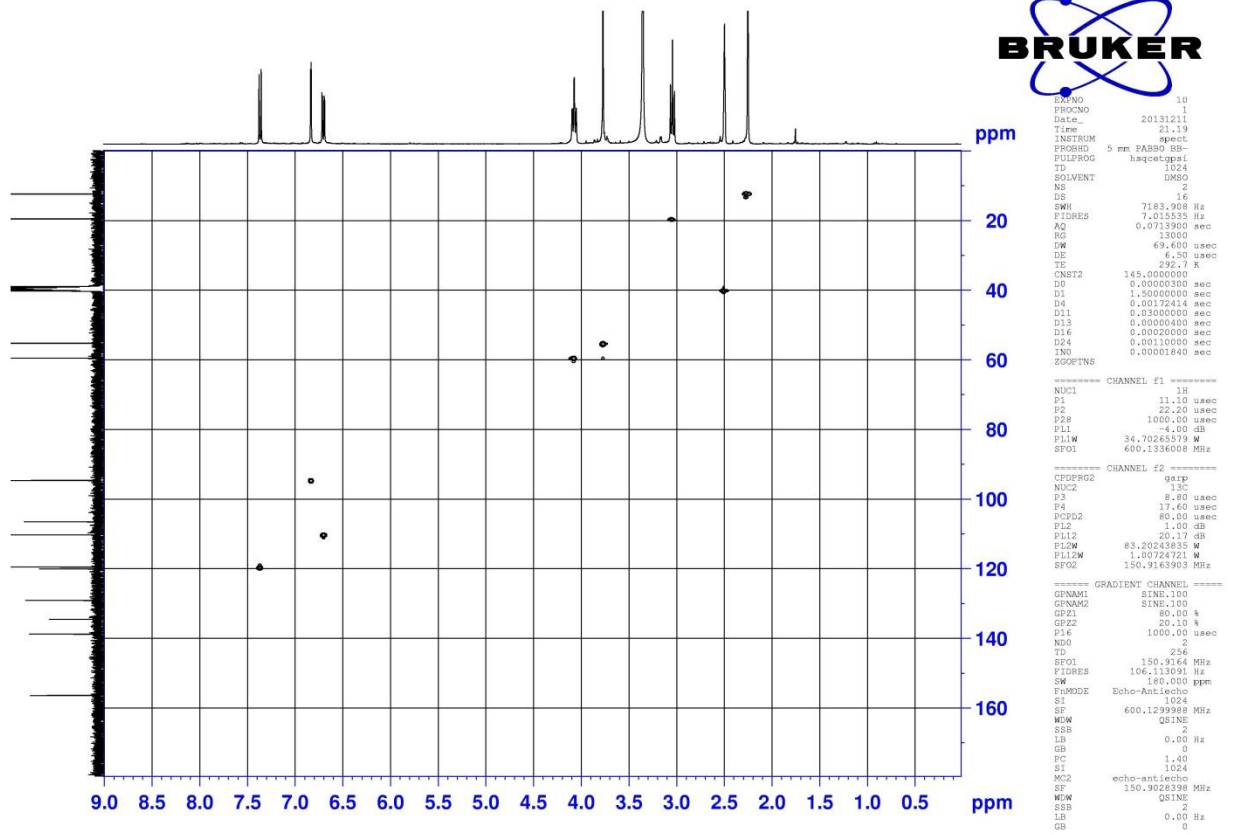

Figure S48 The HMBC spectrum of pegaharminine I (8) in DMSO-*d*<sub>6</sub> (600 MHz)

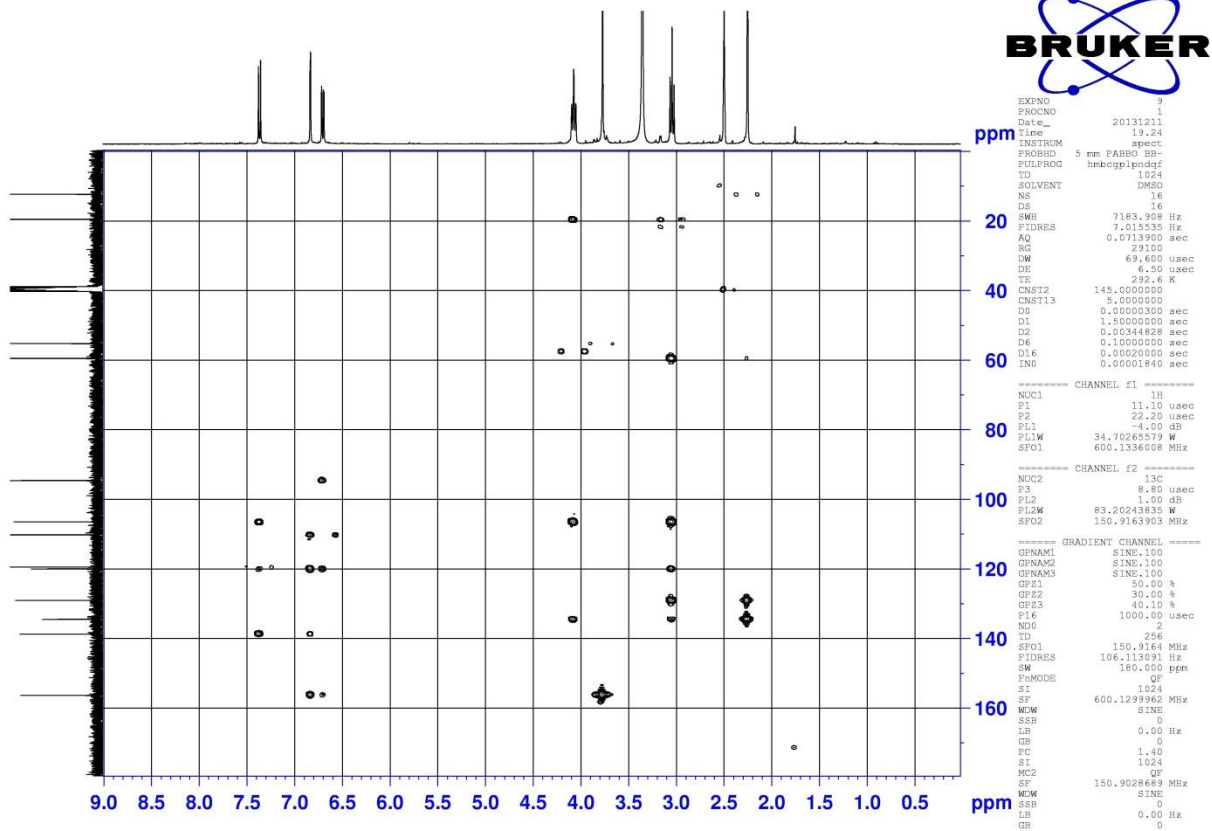

**Figure S49** The HRESIMS spectrum of pegaharmine I (**8**) in MeOH

## Mass Spectrum Molecular Formula Report

**Analysis Info**

Analysis Name D:\Data\20131218-CEYANG\WKB-43A\_1-b,2\_01\_2475.d  
 Method 20131026\_ceyang.m  
 Sample Name WKB-43A  
 Comment

Acquisition Date 12/18/2013 2:10:20 PM

Operator Bruker Customer  
 Instrument / Ser# micrOTOF-Q 125

**Acquisition Parameter**

|             |          |                       |           |                  |           |
|-------------|----------|-----------------------|-----------|------------------|-----------|
| Source Type | ESI      | Ion Polarity          | Positive  | Set Nebulizer    | 1.2 Bar   |
| Focus       | Active   | Set Capillary         | 4500 V    | Set Dry Heater   | 180 °C    |
| Scan Begin  | 50 m/z   | Set End Plate Offset  | -500 V    | Set Dry Gas      | 8.0 l/min |
| Scan End    | 1000 m/z | Set Collision Cell RF | 300.0 Vpp | Set Divert Valve | Source    |

**Generate Molecular Formula Parameter**

|                  |             |                             |       |         |   |
|------------------|-------------|-----------------------------|-------|---------|---|
| Formula, min.    | C13H14N2O2H |                             |       |         |   |
| Formula, max.    |             |                             |       |         |   |
| Measured m/z     | 231.113     | Tolerance                   | 5 ppm | Charge  | 1 |
| Check Valence    | no          | Minimum                     | 0     | Maximum | 0 |
| Nitrogen Rule    | yes         | Electron Configuration both |       |         |   |
| Filter H/C Ratio | yes         | Minimum                     | 0     | Maximum | 3 |
| Estimate Carbon  | yes         |                             |       |         |   |

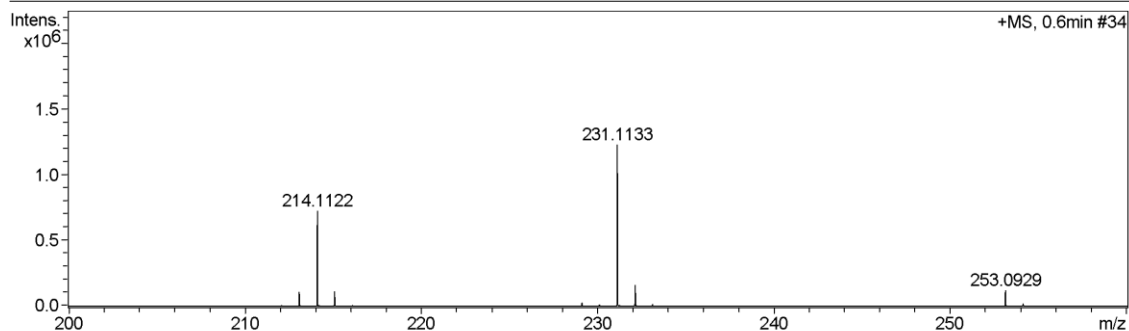

| Sum Formula       | Sigma | m/z      | Err [ppm] | Mean Err [ppm] | Err [mDa] | rdb  | N Rule | e <sup>-</sup> |
|-------------------|-------|----------|-----------|----------------|-----------|------|--------|----------------|
| C 13 H 15 N 2 O 2 | 0.014 | 231.1128 | -2.19     | -1.23          | -0.51     | 7.50 | ok     | even           |

Figure S50 The  $^1\text{H}$  NMR spectrum of pegaharmino J (9) in  $\text{DMSO-}d_6$  (400 MHz)

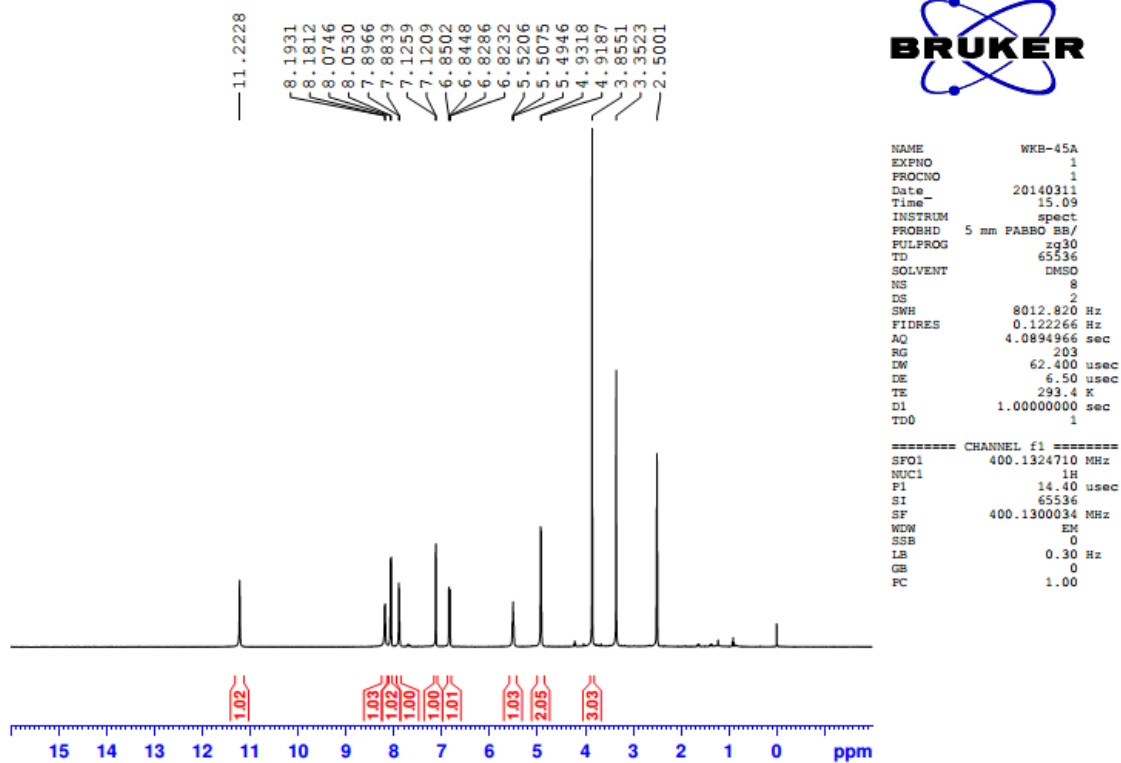

Figure S51 The  $^{13}\text{C}$  NMR spectrum of pegaharmine J (9) in  $\text{DMSO-}d_6$  (100 MHz)

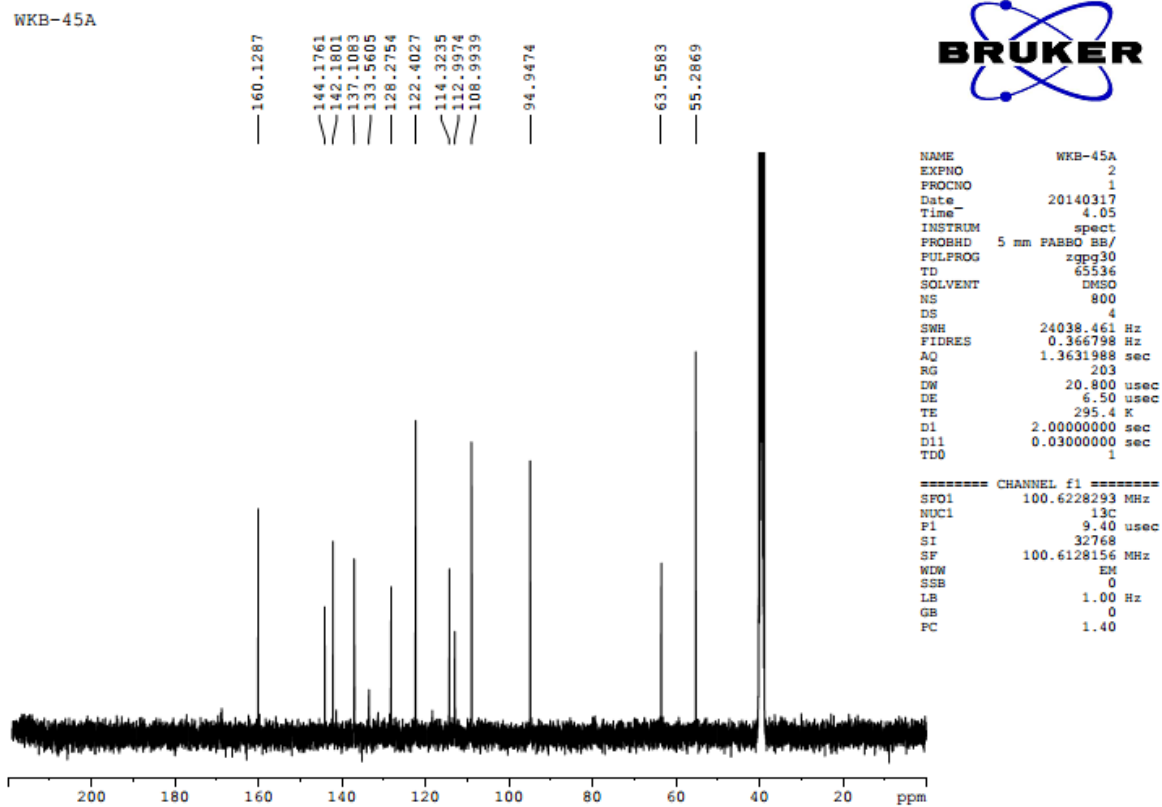

Figure S52 The HSQC spectrum of pegaharmino J (9) in DMSO-*d*<sub>6</sub> (600 MHz)

AV-600-HSQC  
Sample:

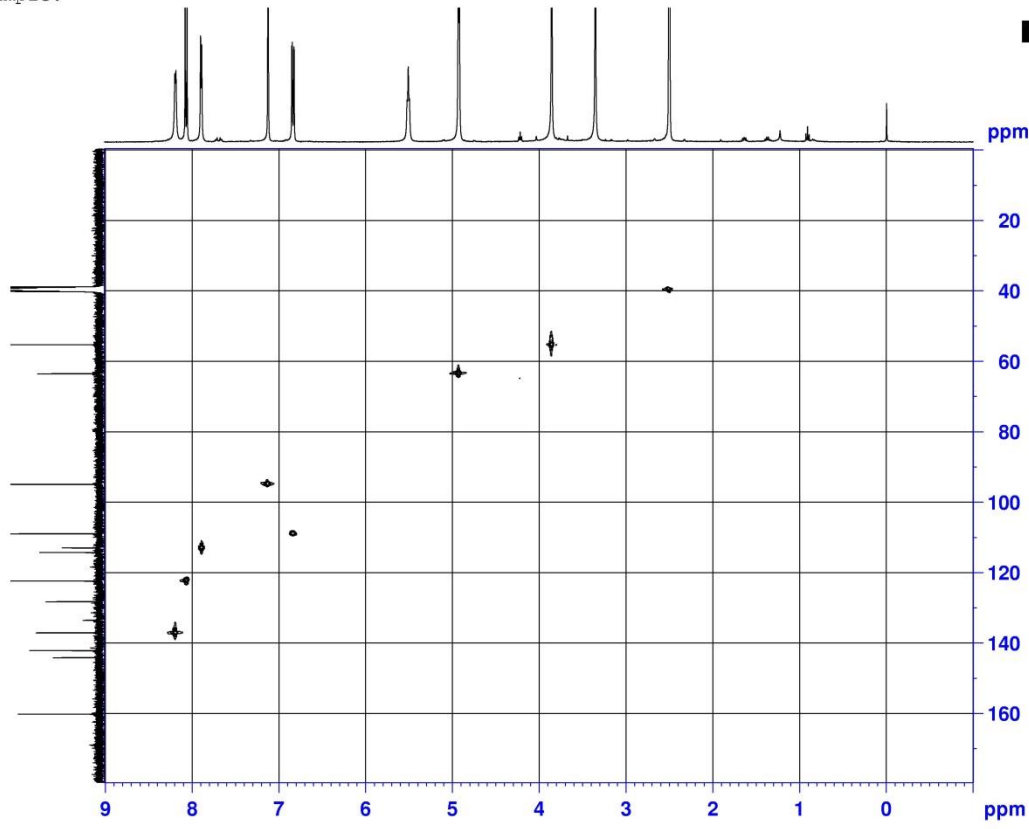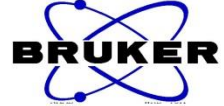

```

EXPNO 2
PROCNO 1
Date_ 20140331
Time 17.46
INSTRUM spect
PROBHD 5 mm PABBO BB-
PULPROG hsqcetps1
TD 1024
SOLVENT DMSO
NS 2
DS 16
SWH 6613.757 Hz
FIDRES 6.458747 Hz
AQ 0.0773400 sec
RG 29100
DW 75.600 usec
DE 4.50 usec
TE 292.9 K
CNS22 145.000000
DO 0.0000000 sec
D1 1.5000000 sec
D4 0.00172414 sec
D11 0.0300000 sec
D13 0.0000040 sec
D16 0.0002000 sec
D24 0.0011000 sec
LNO 0.0001653 sec
ZSOPTRN
----- CHANNEL f1 -----
NUC1 1H
P1 11.10 usec
P2 22.20 usec
P24 1000.00 usec
PL1 -4.00 dB
PL1W 34.7026579 W
SFO1 600.1327000 MHz
----- CHANNEL f2 -----
CDEPRG2 9atp
NUC2 13C
P3 2.80 usec
P4 17.60 usec
PCPD2 80.00 usec
PL2 1.00 dB
PL12 20.17 dB
PL2W 83.20245833 W
PL12W 1.00724721 W
SFO2 150.9162090 MHz
----- GRADIENT CHANNEL -----
GPNAM1 SINE.100
GPNAM2 SINE.100
GPZ1 80.00 %
GPZ2 20.10 %
P16 1000.00 usec
ND0 2
SFO1 150.9163 MHz
FIDRES 117.905366 Hz
SW 200.000 ppm
PnMODE Echo-Antiecho
SI 1024
SF 600.1299982 MHz
WDM QSINE
SSB 2
LB 0.00 Hz
GB 0
PC 1.40
SI 1024
MC2 echo-antiecho
SF 150.9029049 MHz
WDM QSINE
SSB 2
LB 0.00 Hz
GB 0
    
```

Figure S53 The HMBC spectrum of pegaharmine J (9) in DMSO-*d*<sub>6</sub> (600 MHz)

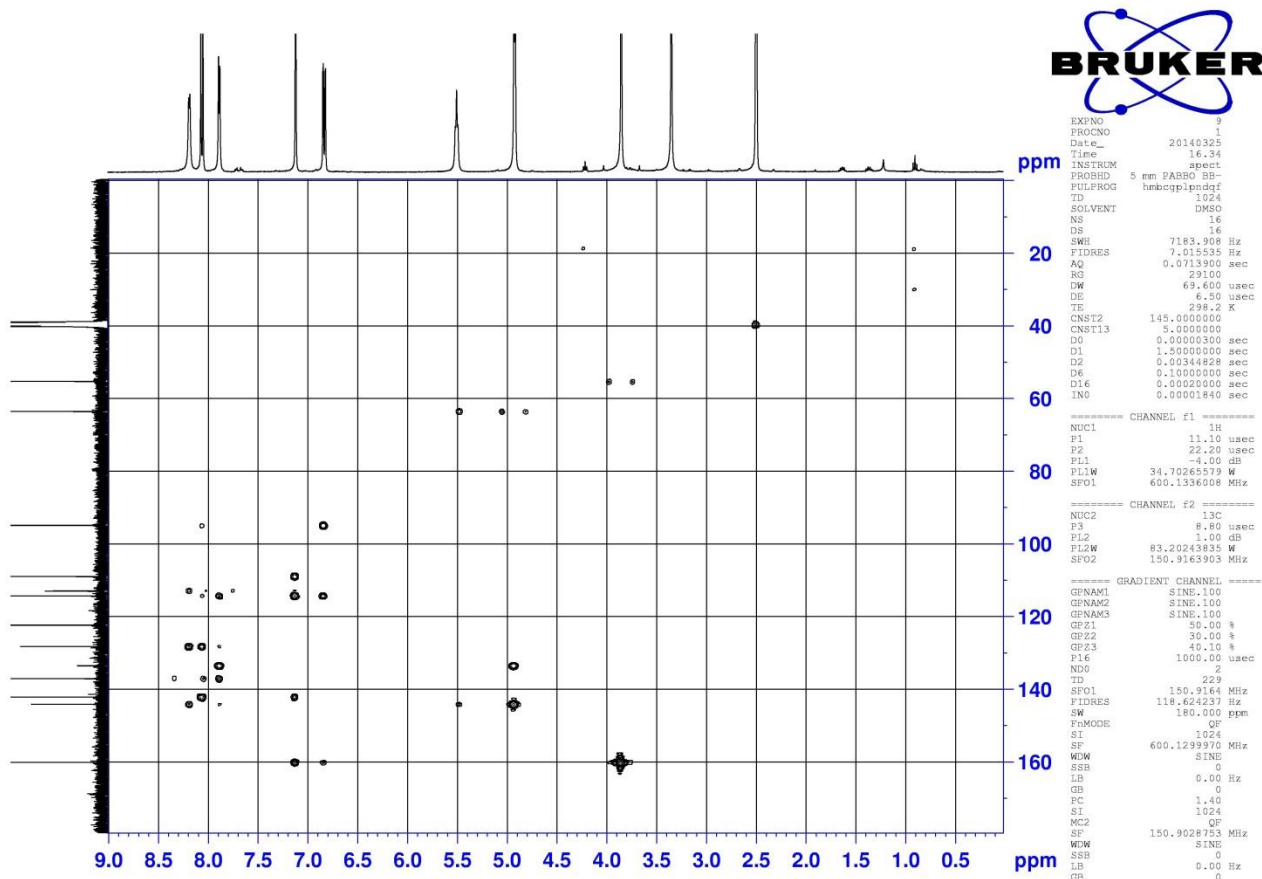

**Figure S54** The HRESIMS spectrum of pegaharmine J (**9**) in MeOH

## Mass Spectrum Molecular Formula Report

**Analysis Info**

Analysis Name D:\Data\20140327CEYANG\WKB-45A\_2-a,6\_01\_3010.d  
 Method 20131026\_ceyang.m  
 Sample Name WKB-45A  
 Comment

Acquisition Date 3/27/2014 6:24:31 PM  
 Operator Bruker Customer  
 Instrument / Ser# micrOTOF-Q 125

**Acquisition Parameter**

|             |          |                       |           |                  |           |
|-------------|----------|-----------------------|-----------|------------------|-----------|
| Source Type | ESI      | Ion Polarity          | Positive  | Set Nebulizer    | 1.2 Bar   |
| Focus       | Active   | Set Capillary         | 4500 V    | Set Dry Heater   | 180 °C    |
| Scan Begin  | 50 m/z   | Set End Plate Offset  | -500 V    | Set Dry Gas      | 8.0 l/min |
| Scan End    | 1000 m/z | Set Collision Cell RF | 300.0 Vpp | Set Divert Valve | Source    |

**Generate Molecular Formula Parameter**

|                  |             |                             |       |         |   |
|------------------|-------------|-----------------------------|-------|---------|---|
| Formula, min.    | C13H12N2O2H |                             |       |         |   |
| Formula, max.    |             |                             |       |         |   |
| Measured m/z     | 229.098     | Tolerance                   | 5 ppm | Charge  | 1 |
| Check Valence    | no          | Minimum                     | 0     | Maximum | 0 |
| Nitrogen Rule    | no          | Electron Configuration both |       |         |   |
| Filter H/C Ratio | no          | Minimum                     | 0     | Maximum | 3 |
| Estimate Carbon  | yes         |                             |       |         |   |

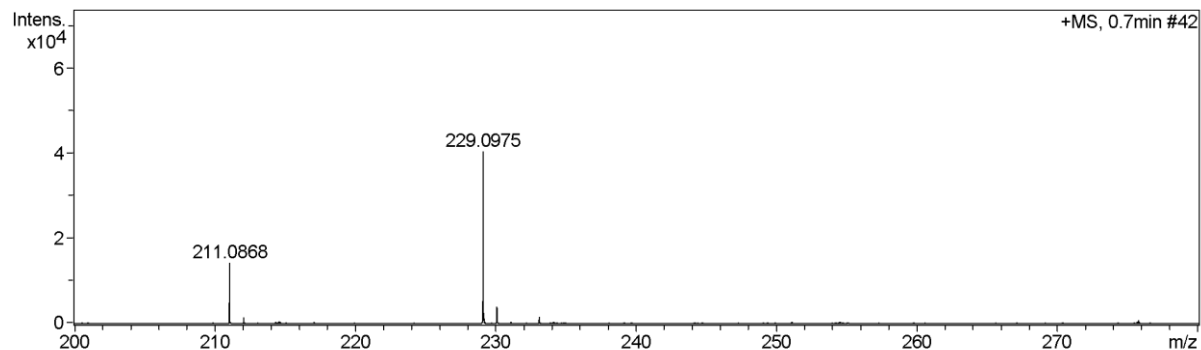

| Sum Formula       | Sigma | m/z      | Err [ppm] | Mean Err [ppm] | Err [mDa] | rdb  | N Rule | e <sup>-</sup> |
|-------------------|-------|----------|-----------|----------------|-----------|------|--------|----------------|
| C 13 H 13 N 2 O 2 | 0.032 | 229.0972 | -1.53     | -2.32          | -0.35     | 8.50 | ok     | even           |



Figure S55 The <sup>1</sup>H NMR spectrum of pegaharminine K (10) in DMSO-d<sub>6</sub> (600 MHz)

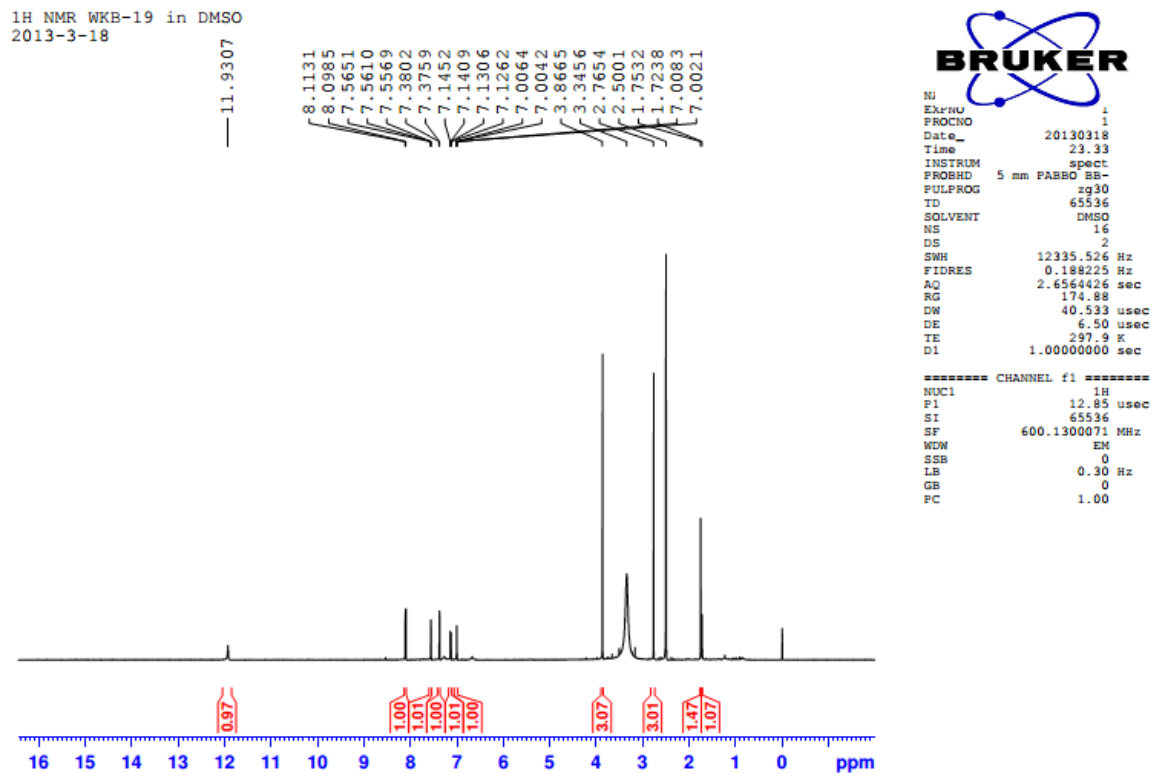

Figure S56 The  $^{13}\text{C}$  NMR spectrum of pegaharmine K (**10**) in  $\text{DMSO-}d_6$  (150 MHz)

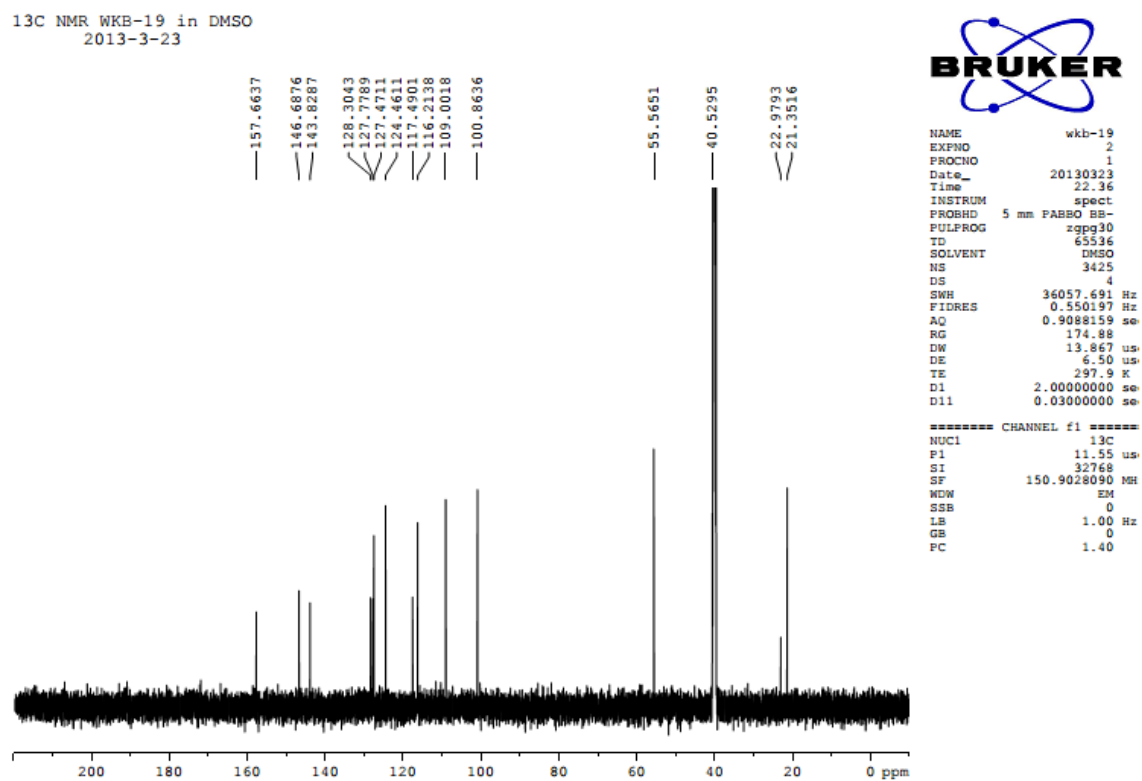

Figure S57 The  $^1\text{H}$ - $^1\text{H}$  COSY spectrum of pegaharimine K (**10**) in  $\text{DMSO-}d_6$  (600 MHz)

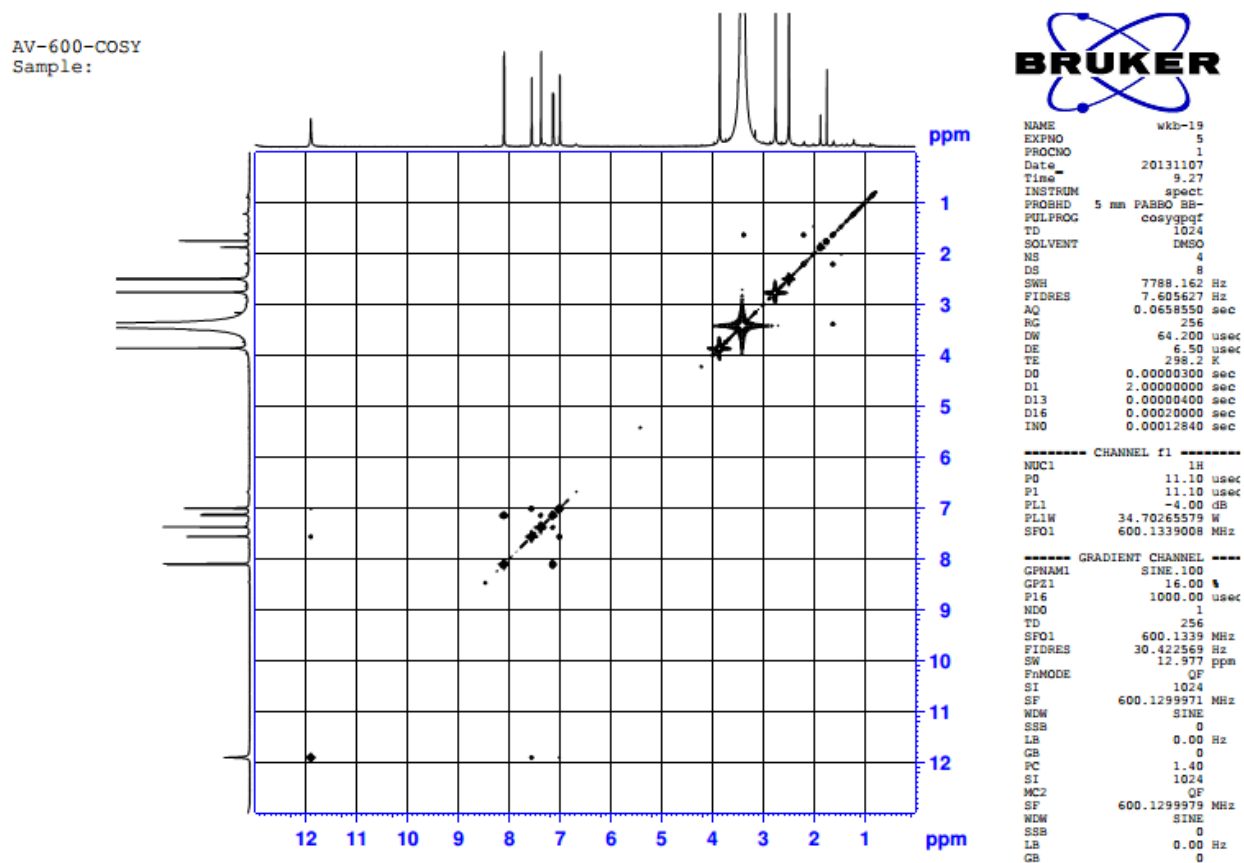

Figure S58 The HMBC spectrum of pegaharmine K (10) in DMSO-*d*<sub>6</sub> (600 MHz)

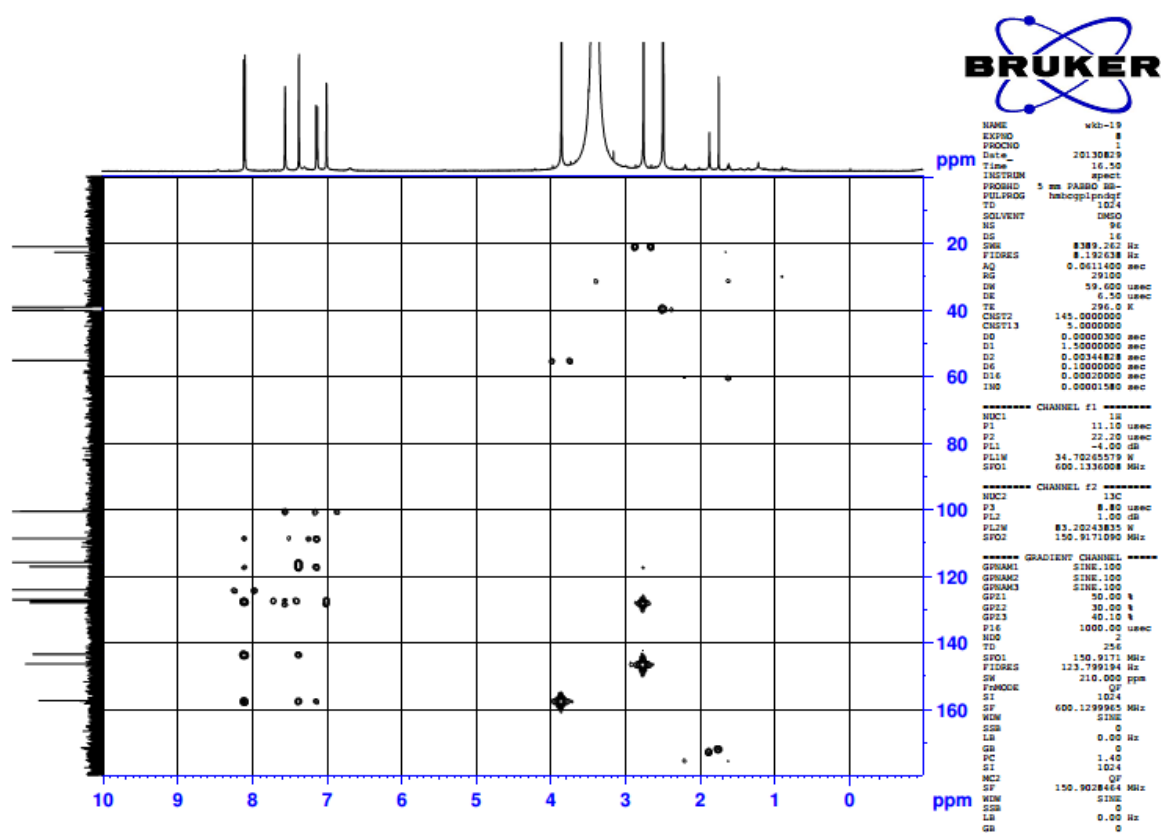

**Figure S59** The NOESY spectrum of pegaharminine K (**10**) in DMSO-*d*<sub>6</sub> (600 MHz)

AV-600-NOESY  
Sample:

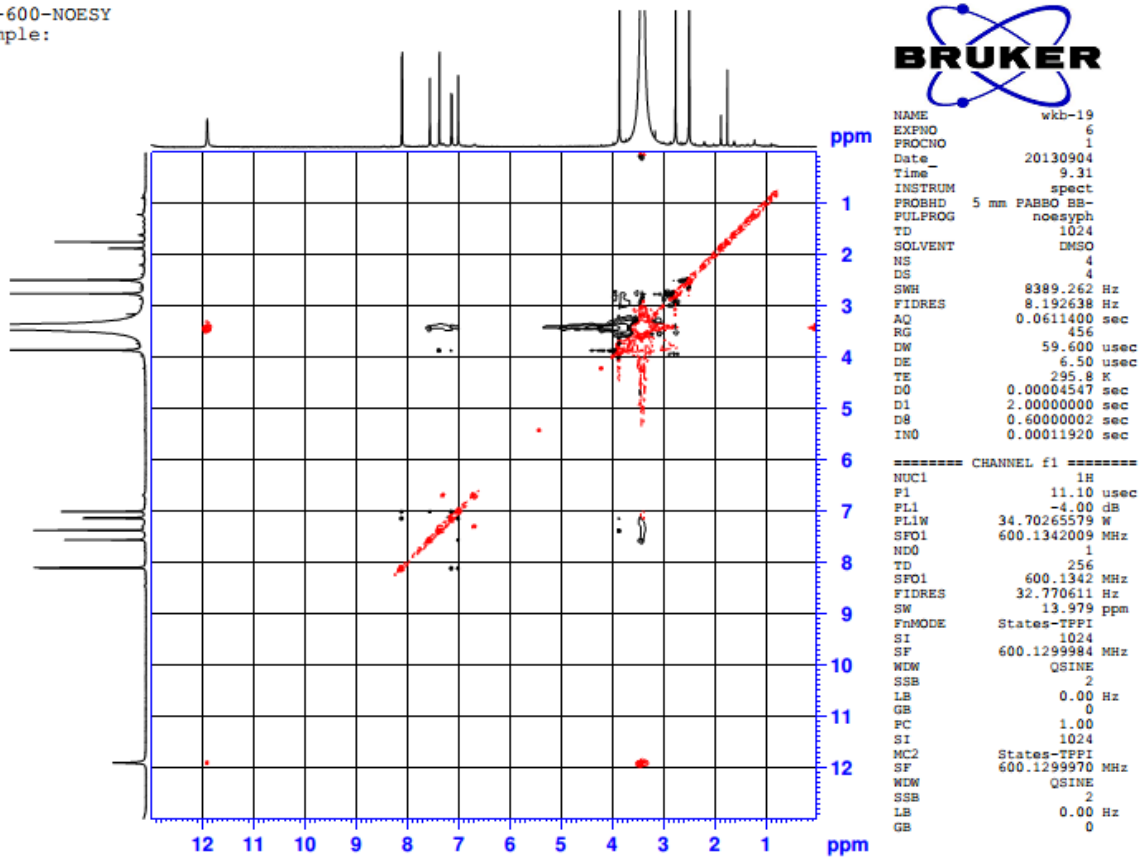

**Figure S60** The HRESIMS spectrum of pegaharmine K (**10**) in MeOH

### Mass Spectrum Molecular Formula Report

**Analysis Info**

Analysis Name D:\Data\20131031-CEYANG\WKB-19\_1-a,1\_01\_1959.d  
 Method ldj\_bga\_jh.m  
 Sample Name WKB-19  
 Comment

Acquisition Date 10/31/2013 1:52:49 PM

Operator Bruker Customer  
 Instrument / Ser# micrOTOF-Q 125

**Acquisition Parameter**

|             |          |                       |           |                  |           |
|-------------|----------|-----------------------|-----------|------------------|-----------|
| Source Type | ESI      | Ion Polarity          | Positive  | Set Nebulizer    | 0.3 Bar   |
| Focus       | Active   | Set Capillary         | 4500 V    | Set Dry Heater   | 180 °C    |
| Scan Begin  | 50 m/z   | Set End Plate Offset  | -500 V    | Set Dry Gas      | 4.0 l/min |
| Scan End    | 1000 m/z | Set Collision Cell RF | 250.0 Vpp | Set Divert Valve | Source    |

**Generate Molecular Formula Parameter**

|                  |            |                        |        |         |   |
|------------------|------------|------------------------|--------|---------|---|
| Formula, min.    | C13H13N2O1 |                        |        |         |   |
| Formula, max.    |            |                        |        |         |   |
| Measured m/z     | 213.102    | Tolerance              | 10 mDa | Charge  | 1 |
| Check Valence    | no         | Minimum                | 0      | Maximum | 0 |
| Nitrogen Rule    | no         | Electron Configuration | both   |         |   |
| Filter H/C Ratio | no         | Minimum                | 0      | Maximum | 3 |
| Estimate Carbon  | yes        |                        |        |         |   |

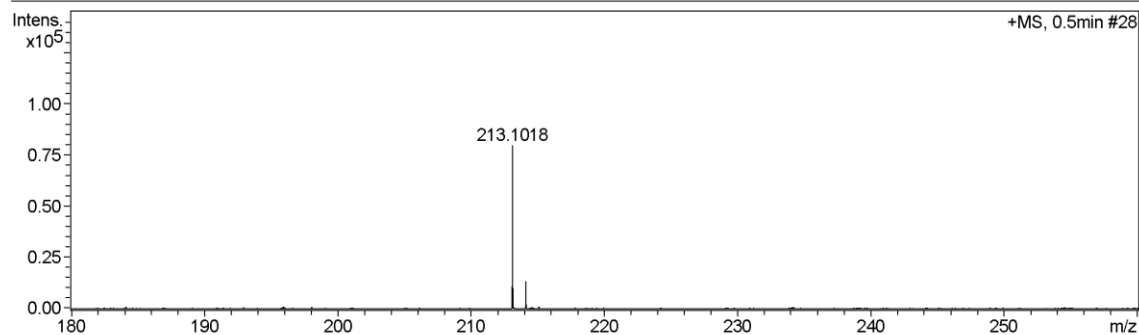

| Sum Formula       | Sigma | m/z      | Err [ppm] | Mean Err [ppm] | Err [mDa] | rdb  | N Rule | e <sup>-</sup> |
|-------------------|-------|----------|-----------|----------------|-----------|------|--------|----------------|
| C 13 H 13 N 2 O 1 | 0.011 | 213.1022 | 1.95      | 4.76           | 0.42      | 8.50 | ok     | even           |
